1                   **Coherent mapping of position and head direction across auditory and visual cortex**

2

Paul EC Mertens<sup>1</sup>, Pietro Marchesi<sup>1</sup>, Matthijs oude Lohuis<sup>1</sup>, Quincy Krijger<sup>1</sup>, Cyriel MA Pennartz<sup>1,2</sup> and  
Carlen S Lansink<sup>1,2</sup>

<sup>1</sup>Swammerdam Institute for Life Sciences, Center for Neuroscience, Faculty of Science, University of  
Amsterdam, Science Park 904, 1098 XH, Amsterdam, the Netherlands.

<sup>2</sup>Research Priority Program Brain and Cognition, University of Amsterdam, Science Park 904, 1098 XH,  
Amsterdam, the Netherlands.

Corresponding Author: Cyriel MA Pennartz, [c.m.a.pennartz@uva.nl](mailto:c.m.a.pennartz@uva.nl)

**Abstract**

3    Neurons in primary visual cortex (V1) may not only signal current visual input but also relevant contextual  
4    information such as reward expectancy and the subject's spatial position. Such location-specific  
5    representations need not be restricted to V1 but could participate in a coherent mapping throughout  
6    sensory cortices. Here we show that spiking activity in primary auditory cortex (A1) and lateral, secondary  
7    visual cortex (V2L) of freely moving rats coherently represents a location-specific mapping in a sensory  
8    detection task performed on a figure-8 maze. Single-unit activity of both areas showed extensive  
9    similarities in terms of spatial distribution, reliability and position coding. Importantly, reconstructions of  
10   subject position on the basis of spiking activity displayed decoding errors that were correlated between  
11   areas in magnitude and direction. In addition to position, we found that head direction, but not locomotor  
12   speed or head angular velocity, was an important determinant of activity in A1 and V2L. Finally, pairs of  
13   units within and across areas showed significant correlations in instantaneous variability of firing rates  
14   (noise correlations). These were dependent on the spatial tuning of cells as well as the spatial position of  
15   the animal. We conclude that sensory cortices participate in coherent, multimodal representations of the  
16   subject's sensory-specific location. These may provide a common reference frame for distributed cortical  
17   sensory and motor processes and may support crossmodal predictive processing.

18

## 19 Introduction

20 Early sensory cortical areas were long viewed to primarily function as collections of unisensory  
21 feature detectors (DiCarlo and Cox, 2007; Felleman and Van Essen, 1991; Hubel and Wiesel, 1962; Miller,  
22 2016). More recently, single unit recordings in awake, behaving animals have shown responses in primary  
23 auditory (A1) and visual cortex (V1) to a wide variety of perceptual and behavioral factors, suggesting  
24 these areas have functions beyond unimodal sensory processing. In rodent V1, these include responses  
25 to reward and reward timing (Shuler and Bear, 2006), reward predictive stimuli (Goltstein et al., 2013),  
26 running speed (Ayaz et al., 2013; Niell and Stryker, 2010), head orienting movements (Guitchounts et al.,  
27 2020) and responses which are causal to visually cued action timing (Namboodiri et al., 2015).  
28 Additionally, a growing number of studies show that many V1 neurons display location-selective spiking  
29 activity (Ji and Wilson, 2007), coding the animal's position along real (Haggerty and Ji, 2015) and virtual  
30 linear tracks (Fiser et al., 2016; Fournier et al., 2020; Pakan et al., 2018; Saleem et al., 2018). Various  
31 studies report spatial and temporal correlations in activity of V1 and hippocampal CA1, including  
32 correlated errors in position decoding (Fournier et al., 2020; Saleem et al., 2018), correlated trial-by-trial  
33 shifts in preferred spiking locations (Haggerty and Ji, 2015) and significant spike-phase coherence of V1  
34 spiking and hippocampal theta oscillations (Fournier et al., 2020).

35 A similarly broad variety of single unit correlates is observed in A1, including activity selective for  
36 visual task-cues (Brosch et al., 2005), behavioral demands (Scheich et al., 2007), stimulus expectation  
37 (Jaramillo and Zador, 2011), reward (Scheich et al., 2007) and instrumental action (Niwa et al., 2012).  
38 Much remains currently unknown about the functional role and origins of such 'extra-modal' activity  
39 correlates, including whether they primarily contribute to local sensory processes or reflect crossmodal  
40 interactions in service of more general and modality-independent cortical functions. While spiking  
41 correlates to stimulus location are present in auditory cortex (Town et al., 2017), no activity selective for  
42 the spatial position of the subject has hitherto been reported for A1. This would be expected if the  
43 underlying mechanisms reflect general functions of cortical sensory processing, including the  
44 maintenance and updating of a coherent representation of space or of current and future sensory states  
45 across sensory domains (Fiser et al., 2016; Friston, 2005; Gavornik and Bear, 2014; Pennartz et al., 2019;  
46 Rao and Ballard, 1999).

47 To determine whether location-selective spiking activity exists outside of the visual cortical  
48 system and whether such activity provides a coherent representation across sensory modalities, we  
49 analyzed single-unit data recorded simultaneously from two anatomically connected, sensory cortical  
50 areas of freely moving rats: primary auditory cortex (A1) and lateral, secondary visual cortex (V2L). We

51 show spatially localized firing patterns in large proportions of V2L and A1 single units that are reliable over  
52 time. Firing patterns in each area collectively tiled the entire behavioral track, so that every location was  
53 marked by activity of a subset of neurons. Reconstructions of the rat's position afforded by the spiking  
54 activity of each area showed reconstruction errors that were correlated in magnitude and direction,  
55 thereby indicating that representations in A1 and V2L are coherent. Cross-areal coordination of location-  
56 specific representations was further indicated by strong noise-correlations in spiking activity of the vast  
57 majority of single-unit pairs which showed a clear pattern of dependence on both the spatial tuning of the  
58 units as well as animal position. Our freely moving paradigm allowed us to establish the contributions of  
59 position, head direction and their temporal derivatives to location-selective spiking activity in early  
60 sensory cortices dedicated to different modalities. Our results uncover striking similarities as well as  
61 quantitative differences in location-selective neural activity of A1 and V2L, suggesting that such activity  
62 supports common functions in coordinated mapping of sensory and contextual representations across  
63 different sensory modalities.  
64

## 65 **Results**

66 We investigated the responsiveness of neurons in lateral, secondary visual cortex (V2L) and primary  
67 auditory cortex (A1) to spatial location when rats were running on a rectangular, figure-8 shaped track  
68 (Fig.1A). On the track, rats performed an audio-visual discrimination task in which they earned reward by  
69 responding to the most salient stimulus out of two by running from the stimulus presentation site to the  
70 reward well on the track side corresponding to the location of that stimulus (Fig. 1 A-B). Our analyses were  
71 primarily based on the spatial components of the rats' behavior, regardless of task performance. We refer  
72 to "location-selective activity" or a "location correlate" if the neuron's spiking activity was reliably  
73 modulated by the rat's body location over the course of a recording session. We emphasize that this  
74 definition includes not only responses to allocentric position, but also to specific conjunctions of locally  
75 available sensory cues and task-related information.

76 We made simultaneous recordings from both V2L and A1, with a total of 526 single units from  
77 V2L and 603 units from A1 across 17 recording sessions from 3 rats. Units in both A1 and V2L showed  
78 firing patterns with one or more peaks in firing rate on various locations of the track (Fig. 1C, 2A-B). For  
79 all further analyses, we selected the units with sufficient firing on the track, i.e. peak firing rate above 2  
80 Hz in the spatial map, which amounted to 400 units from V2L and 413 from A1. The locations of the tetrode  
81 endpoints were verified with histology (Supplementary Fig. 1). The endpoints of 20 tetrodes were located  
82 in A1, while an additional two endpoints targeted at A1 were located in the adjacent dorsal secondary  
83 auditory cortex. Endpoints for 19 tetrodes targeted at V2L were located in that area, while one was  
84 located in the adjacent dorsal posterior parietal cortex.

85

### 86 *The majority of A1 and V2L single units displays localized spiking activity*

87 First, we assessed whether neurons in A1 and V2L displayed spatially localized firing patterns. Visual  
88 inspection of rate maps of the spatial firing distribution of individual neurons indicated that some units in  
89 A1 and V2L showed increased spiking activity in a single, concentrated location on the track, whereas  
90 other units displayed modulations of spiking activity at multiple areas or across a larger area of the track  
91 (Fig. 2A-B *top panels*). An important constraint for a unit to reliably code location is that the firing activity  
92 at that location is consistently, rather than incidentally, present across individual traversals through that  
93 location. Therefore, we assessed the reliability of each unit by computing pairwise correlations between  
94 all single-trial rate maps of that unit and comparing the observed mean pairwise correlation with a  
95 shuffled distribution. A unit was considered spatially stable if its observed mean correlation was larger  
96 than 95% of the shuffled distribution. The proportions of spatially stable units were very similar for A1

97 and V2L and comprised on average about 70% of the total population (Fig. 2C; A1: 0.69 (CI: 0.49, 0.84),  
98 V2L: 0.72 (CI: 0.31, 0.94),  $F(1, 32) = 0.072$ ,  $p = 0.79$ , ANOVA). The degree of spatial stability of a unit can  
99 be quantified using a spatial stability index (SSI), defined as the number of standard deviations which the  
100 observed mean correlation was removed from the shuffled distribution (Fig. 2D). The SSI of spatially stable  
101 units was similar between A1 and V2L (Fig. 2D; A1: 12.7 a.u. (CI: 8.39, 15.44), V2L: 14.3 a.u. (CI: 10.4, 24.4),  
102  $F(1, 1194) = 0.44$ ,  $p = 0.50$ , ANOVA). In summary, large fractions of A1 and V2L units display spatially stable  
103 activity patterns with high reliability.

104 Individual firing fields were then identified for spatially stable units as localized increases in mean  
105 spiking activity of a unit on the linearized representation of the track (Fig. 1A, Fig. 2A-B). Whereas neurons  
106 in A1 and V2L exhibited a similar number of around 3 firing fields per unit (Fig. 2E; A1: 3.17 (CI: 2.97, 3.39),  
107 V2L: 3.40 (CI: 3.20, 3.61),  $F(1, 588) = 2.22$ ,  $p = 0.14$ , ANOVA), the average length of firing fields was  
108 significantly smaller in V2L than in A1 (Fig. 2F; A1: 50.5 cm (CI: 47.2, 54.1), V2L: 46.3 cm (CI: 43.5, 49.4),  
109  $F(1, 1939) = 9.0$ ,  $p = 0.003$ , ANOVA), indicating that the spatial granularity of localized spiking activity is  
110 modestly finer in V2L than A1.

111 The extent to which units show spatially localized firing can be expressed as the information about  
112 the rat's position that is conveyed by a single spike, which is quantified as spatial information (Skaggs et  
113 al., 1992). In line with the smaller firing fields in V2L, the spatial information was significantly higher for  
114 V2L units (Fig. 2G; A1: 0.15 bits/spike (CI: 0.12, 0.17), V2L: 0.24 bits/spike (CI: 0.20, 0.28),  $F(1,556) = 16.5$ ,  
115  $p = 5 \times 10^{-5}$ , ANOVA).

116

### 117 *Both A1 and V2L neurons respond to discrete auditory and visual stimuli*

118 Besides showing location-selective firing, subsets of units in both A1 and V2L responded with significant  
119 firing-rate changes to the auditory and visual stimuli, presented as individual (unisensory) task cues (Fig.  
120 2H; stimulus conditions were pooled for each modality; see Methods). As expected, a larger proportion  
121 of A1 neurons responded to auditory than to visual stimuli in all rats (A1 auditory: 0.20 (CI: 0.15, 0.28), A1  
122 visual: 0.07 (CI: 0.04, 0.13),  $F(1, 30) = 10.34$ ,  $p = 0.003$ , ANOVA). Additionally, responsiveness to visual  
123 stimuli was more common in V2L than A1 (V2L visual: 0.15 (CI: 0.09, 0.24),  $F(1,30) = 4.60$ ,  $p = 0.0402$ ,  
124 ANOVA). Surprisingly, however, a comparable proportion of V2L neurons responded to both visual and  
125 auditory (stimuli. (V2L auditory: 0.20, (CI: 0.15, 0.26),  $F(1, 30) = 0.93$ ,  $p = 0.34$ , ANOVA) and auditory  
126 responses were equally common in both areas ( $F(1, 30) = 0.013$ ,  $p = 0.91$ , ANOVA). Although A1 and V2L  
127 responsiveness to discrete stimuli is not the focus of our current analyses, these results not only indicate  
128 that responses to stimuli in more than one modality are common in both A1 and especially V2L, but also

129 underscore the existence of substantial heterogeneity in cortical sensory selectivity. Finally, it should be  
130 noted that stable, localized activity was much more abundant in both areas than responses to sensory  
131 stimuli (A1:  $p < 10^{-15}$ ; V2L:  $p < 10^{-13}$ , binomial tests on pooled data).

132

### 133 *Spatial firing field distributions are highly correlated across A1 and V2L*

134 The reliable coding of specific locations by individual units is necessary, but not sufficient for building a  
135 representation of an environment or the sequence of sensory states an animal experiences when  
136 navigating across the track. Another prerequisite for either type of representation would be that the  
137 spatial distribution of firing fields in each area covers the entire series of locations traversed by the animal.  
138 Figure 3A and B show the linear rate maps for all spatially stable units ordered by peak location for A1 and  
139 V2L, and reveal that firing-field peaks occur at every location along the track. We further analyzed the  
140 density of firing fields tiling all locations by computing the proportion of firing fields which include a  
141 specific spatial bin on the linearized track. The distributions of firing field densities confirm that the entire  
142 track was covered by A1 and V2L firing fields (Fig. 3A-B, bottom).

143 The joint rate maps and field density plots indicate similar firing-field distributions in A1 and V2L.  
144 Indeed, the field densities across spatial bins of the track were highly correlated between the areas (Fig.  
145 3C; regression slope: 0.83 (CI: 0.57, 1.09),  $F(1, 39.5) = 3.2$ ,  $p = 0.007$ , ANOVA). This strong correlation,  
146 however, may also be due to similar responses of A1 and V2L neurons to behavioral covariates such as  
147 locomotion speed, acceleration and head direction ( $\theta_{\text{head}}$ ). To correct for the potential influence of these  
148 covariates on field densities, we performed linear regression of spiking activity on running speed,  
149 acceleration, head direction and the angular change in head direction ( $\Delta\theta_{\text{head}}$ ) and repeated the detection  
150 of firing fields and the field density correlations on the residuals. Likewise, when using the model's  
151 residuals, field densities between A1 and V2L were highly correlated (regression slope: 0.71 (CI: 0.36, 1.06),  
152  $F(1, 3.0) = 16.1$ ,  $p = 0.028$ , ANOVA). It is therefore unlikely that locomotion and head direction can fully  
153 explain the firing-field densities of A1 and V2L neurons on the track or their shared spatial distribution.  
154 These analyses, however, did not take into account possible nonlinear relationships between location and  
155 behavioral covariates.

156

### 157 *Temporal firing rate fluctuations are correlated between A1 and V2L*

158 Neurons with similar functional properties, such as location-selective tuning in hippocampal and V1  
159 neurons, were shown to exhibit significant pairwise correlations of the instantaneous variability in spiking  
160 activity, often referred to as 'noise correlations' (Haggerty and Ji, 2015). As a first indication of a

161 correlative interaction between spatially stable neurons within and across A1 and V2L, we tested how  
162 closely the precise firing rate between two units of a pair varied each time the rat ran through the  
163 associated firing fields. For each pair of units (A1-A1, V2L-V2L, A1-V2L) the Pearson correlation was  
164 computed between their instantaneous variability in spiking activity after subtraction of the mean activity  
165 in the associated spatial bin (i.e. noise correlation), as well as the Pearson correlation between the rate  
166 maps. Noise correlations were significantly different from 0 for very large proportions of neuronal pairs  
167 of each composition (fraction of total: A1-A1: 0.98, V2L-V2L: 0.98, A1-V2L: 0.97; permutation test,  $p < 0.05$ ).  
168 Almost half of the significantly correlated pairs showed negative noise correlations (A1-A1: 0.46, V2L-V2L:  
169 0.47, A1-V2L: 0.45). Proceeding only with pairs showing significant noise correlations, we tested whether  
170 rate map similarity predicted noise correlations using a linear mixed model and correcting for sampling  
171 bias. Rate-map correlations had a significant, positive effect on noise correlations for all pair types (Fig.  
172 3D-E; regression slopes and 95% confidence bounds for A1-A1: 0.072 (0.060, 0.085),  $F(1, 4.8) = 123.9$ ,  $p$   
173  $= 3.9 \times 10^{-4}$ , V2L-V2L: 0.066 (0.051, 0.082),  $F(1, 4.17) = 110.4$ ,  $p = 7.4 \times 10^{-4}$ , A1-V2L: 0.033 (0.018, 0.048),  
174  $F(1, 3.67) = 29.3$ ,  $p = 0.007$ , ANOVA). The effect of rate map similarity was smaller for A1-V2L pairs than  
175 for the other pair types (A1-V2L slope vs. A1-A1 slope:  $F(1, 9386) = 95.9$ ,  $p < 10^{-15}$ , A1-V2L slope vs. V2L-  
176 V2L slope:  $F(1, 10174) = 83.2$ ,  $p < 10^{-15}$ , ANOVA), which is in line with previous observations on noise  
177 correlation strength decreasing with anatomical distance observed in visual cortex of anesthetized cats,  
178 mice and macaques (Goltstein et al., 2015; Rosenbaum et al., 2017; Schulz et al., 2015; Smith and Kohn,  
179 2008). Nonetheless, the V2L-A1 noise correlates and their predictability from rate-map correlations  
180 suggests cross-areal coordination of neural activity.

181

### 182 *Noise correlations within and between areas show location-dependent structure*

183 Correlated firing rate fluctuations can affect the coding of information in populations of neurons (Ecker et  
184 al., 2010; Hansen et al., 2012; Montijn et al., 2016; Zohary et al., 1994). The strength of correlated  
185 variability in the visual system was found to depend on both the tuning of neurons and the presented  
186 stimuli, with similarly tuned neurons displaying stronger correlated variability specifically for their  
187 preferred stimuli and reduced correlations for orthogonal stimuli, thereby ameliorating the potentially  
188 detrimental effect of correlated variability on population coding (Averbeck et al., 2006; Franke et al., 2016;  
189 Lin et al., 2015; Montijn et al., 2016). If the function of location-selective activity in A1 and V2L is to  
190 transmit information related to the animal's position to downstream areas, correlated variability between  
191 neurons in both areas may show similar dependence on spatial tuning and location types. To study this,  
192 for each significantly correlated pair we divided all spatial bins of the track into three categories: bins that

193 occur inside firing fields of both units of the pair ('shared field'), bins that exclusively occur in a firing field  
194 of one of the two units ('one-field'), and bins that are outside of firing fields of both units ('out of field').  
195 The effect of firing-field overlap on noise correlations for each area was examined using a linear mixed  
196 model. Separate models were constructed for positive and negative noise correlations, since the mean  
197 noise correlations of individual groups tended to 0, while a model based on absolute noise correlations  
198 provided a poorer fit to the data.

199 The magnitude of noise correlations followed a consistent pattern across cell pair types with  
200 respect to the type of bin, with shared field bins showing stronger correlations than one-field bins (figure  
201 3F, positive correlations, shared field bins mean = 0.061, one-field bins mean = 0.046,  $F(1, 3.2) = 139.5$ ,  $p$   
202 =  $4.7 \times 10^{-4}$ , negative correlations, shared field bins mean = -0.049, one-field bins mean = -0.035,  $F(1, 8.9)$   
203 = 233.9,  $p = 3.5 \times 10^{-8}$ , ANOVA). Additionally, shared field bins showed stronger correlations than out of  
204 field bins (figure 3F, positive correlations: out of field bins mean = 0.052,  $F(1, 2.9) = 43.3$ ,  $p = 0.008$ ,  
205 negative correlations: out of field bins mean = -0.040,  $F(1, 2.7) = 41.9$ ,  $p = 0.005$ , ANOVA). Finally, out of  
206 field bins showed stronger correlations than one-field bins (figure 3F, positive correlations:  $F(1, 29.3) =$   
207  $28.7$ ,  $p = 3.0 \times 10^{-6}$ , negative correlations:  $F(1, 2.7) = 14.8$ ,  $p = 0.04$ , ANOVA). These findings underscore  
208 the general result that noise correlations are highest in shared field bins and lowest in one-field bins, with  
209 noise correlations in out of field bins being intermediate. The only contrast not obeying this general effect  
210 is the comparison between negative correlations of one-field bins and out of field bins for A1-A1 pairs,  
211 which did not reach significance ( $p = 0.10$ ).

212 The strength of noise correlations was found to depend modestly on the area-based type of cell  
213 pair, with A1-A1 pairs showing stronger noise correlations than A1-V2L pairs (figure 3F, positive  
214 correlations: A1-A1 mean = 0.059, A1-V2L mean = 0.045,  $F(1, 3.1) = 22.6$ ,  $p = 0.048$ , negative correlations:  
215 A1-A1 mean = -0.046, A1-V2L mean = -0.038,  $F(1, 5.2) = 55.78$ ,  $p = 0.002$ , ANOVA). Mean noise correlations  
216 for V2L-V2L cell pairs were intermediate to A1-A1 pairs and A1-V2L pairs, for both positive (V2L-V2L mean  
217 = 0.055) and negative correlations (V2L-V2L mean = -0.040), and differences between V2L-V2L pairs and  
218 the other cell pairs were not significant (all  $p > 0.05$ ). There was no significant interaction between the  
219 type of bin and the composition of the neuronal pairs (positive correlations:  $F(1, 14587) = 1.53$ ,  $p = 0.19$ ,  
220 negative correlations:  $F(1, 8312) = 1.59$ ,  $p = 0.18$ , ANOVA). We found qualitatively similar results when we  
221 defined location type not in terms of falling inside or outside of firing fields of the two units of a pair, but  
222 in terms of falling inside the 30% of bins with highest or lowest spiking activity of the two units of a pair.

223 To summarize, A1 and V2L populations do not only display similar distributions of firing fields  
224 across the maze, but pairs of A1 and V2L neurons also show fine-grained firing rate co-fluctuations which



225 depend on both the similarity of location-selectivity of the units in a pair and the actual position occupied  
226 by the rat. Despite area-dependent differences in noise correlations, the similarity of A1-V2L noise  
227 correlation patterns to within-area co-fluctuations is rather striking.

228

### 229 *A1 activation precedes V2L activation in time*

230 The fine-grained co-fluctuations between A1 and V2L in the spatial domain raise the question how these  
231 interactions are more precisely organized in time. The temporal firing relation between A1-V2L neuronal  
232 pairs was determined by computing the cross-correlograms over periods in which the rat was running on  
233 the track (running speed > 0.06 m/s). To correct for the impact that the forced unidirectional running may  
234 induce in estimating the temporal firing relation, cross-correlations were computed on the z-scored  
235 spiking activity after subtracting the mean activity in the associated spatial bin. Figure 3G shows the  
236 proportions of cross-correlation peaks of all A1-V2L pairs at different time lags averaged over rats. The  
237 narrow peak centered at -10 ms indicates that activation of A1 neurons mostly precedes V2L neuronal  
238 activity closely in time.

239

### 240 *Spiking activity carries information about position and head direction*

241 We next used information-theoretic measures to quantify the influence of navigation parameters, i.e.  
242 position, running speed, head direction ( $\theta_{\text{head}}$ ) and changes in head direction ( $\Delta\theta_{\text{head}}$ ), on the spiking  
243 activity of recorded units. Mutual information (MI) quantifies the reduction in uncertainty obtained about  
244 spiking activity after observing these factors and captures both linear and nonlinear relationships (Lizier,  
245 2014; Olcese et al., 2016). Of these individual factors, position carried the most information about spiking  
246 activity of both A1 and V2L units, followed by head direction (Fig. 4A; MI of position versus  $\theta_{\text{head}}$ : A1:  $p =$   
247  $1.1 * 10^{-15}$ ; V2L:  $p = 3.0 * 10^{-15}$ , Wilcoxon signed-rank test). Running speed and changes in head direction  
248 carried relatively little information about spiking activity in both areas. For all individual factors mean MI  
249 was higher in V2L than in A1 ( $p = 2.0 * 10^{-6}$ ; running speed:  $p = 4.7 * 10^{-4}$ ,  $\theta_{\text{head}}$ :  $p = 1.4 * 10^{-7}$ ,  $\Delta\theta_{\text{head}}$ :  $p =$   
250  $1.6 * 10^{-5}$ , Mann-Whitney's U test).

251 When a particular  $\theta_{\text{head}}$  is predominantly encountered at a given position, mutual information  
252 cannot distinguish between the possibilities of a neuron encoding either that position, head direction or  
253 a combination of the two. To determine the amount of information carried by spikes about speed,  $\theta_{\text{head}}$   
254 and  $\Delta\theta_{\text{head}}$ , that cannot be explained by (nonlinear) correlations with position, we computed the debiased  
255 conditional mutual information (cMI) between each of the three factors conditional on position (Fig. 4B;  
256 (Bos et al., 2019; Lizier, 2014)). Averaged across all spatially stable units, the amount of information that

257 spike trains carried about running speed and changes in head direction beyond position (i.e. mean  
258  $cMI(\text{spikes, speed} \mid \text{position})$  and mean  $cMI(\text{spikes, } \Delta\theta_{\text{head}} \mid \text{position})$ ) was negative for both A1 and V2L,  
259 confirming that running speed and changes in head direction contributed little information about spiking  
260 activity on top of position (fig. 4B). In contrast, the average  $cMI$  for head direction,  $cMI(\text{spikes, } \theta_{\text{head}} \mid$   
261  $\text{position})$ , was significantly larger than zero for both A1 and V2L (fig. 4B, A1:  $p < 10^{-15}$ ; V2L:  $p < 10^{-15}$ ;  
262 Wilcoxon's signed-rank test), indicating that spiking activity of both A1 and V2L units coded information  
263 about head direction in addition to information about position.

264 To study the prevalence of position coding in populations of single units, we calculated  $cMI$   
265 between spikes and position conditional on  $\theta_{\text{head}}$ , thereby excluding any contributions from  $\theta_{\text{head}}$  (Fig. 4C).  
266 Significant  $cMI(\text{spikes, position} \mid \theta_{\text{head}})$  was found in 140 out of 413 A1 units (33%) and 197 out of 400 V2L  
267 units (49%), indicating that spiking activity of large proportions of single units in both areas contains  
268 information on spatial position on top of any information on  $\theta_{\text{head}}$ , with V2L showing a significantly larger  
269 proportion ( $z = 4.64$ ,  $p = 1.7 * 10^{-6}$ , binomial test; Fig. 4D). Smaller, but substantial subsets of neurons in  
270 each area showed significant  $cMI(\text{spikes, } \theta_{\text{head}} \mid \text{position})$ , indicating that the spike trains of these neurons  
271 carry information about head direction even after correcting for position (fig. 4D, A1: 16.5% and V2L:  
272 31.2%), with also here V2L showing a significantly larger proportion of neurons ( $z = 4.9$ ,  $p = 4.2 * 10^{-7}$ ,  
273 binomial test). Among all units encoding position and/or head direction, V2L units were also significantly  
274 more likely to provide information on both factors (fig. 4D, A1: 35.1%, V2L: 47.2%,  $z = 2.33$ ,  $p = 0.010$ ,  
275 binomial test). In summary, this analysis confirmed that substantial fractions of A1 and particularly V2L  
276 neurons continued to show location- and head direction selectivity after correcting for the influence of  
277 the other behavioral covariate.

278  
279 *Position is the strongest predictor of A1 and V2 single unit activity, followed by head direction.*

280 Next we used a random forest encoding algorithm (Benjamin et al., 2018) to determine how well spiking  
281 activity could be predicted by each of the behavioral factors. This provided the opportunity to extend the  
282 analysis of dependencies between behavioral factors and spiking activity beyond two behavioral factors.  
283 Encoding of firing rates of two units from A1 and V2L is exemplified in Figure 4E. For both areas, encoding  
284 quality was best for a model incorporating all predictors (Fig. 4F; all predictors vs. only position for A1 and  
285 V2L combined,  $p < 10^{-15}$ , Wilcoxon's signed-rank test), whereas of the individual factors position provided  
286 the best performance (position vs. each other individual predictor for A1 and V2L, all  $p < 10^{-15}$ , Wilcoxon's  
287 signed-rank tests). The large effect of position on encoding performance could not be explained by  
288 confounds arising from the other behavioral factors, since adding position to a model already utilizing all

289 other factors led to substantial improvements in encoding performance for both A1 and V2L (fig. 4G;  
290 position vs. each other individual factor, all  $p < 10^{-15}$ , A1 and V2L combined, Wilcoxon's signed-rank tests).  
291 Comparing the contributions of position and  $\theta_{\text{head}}$  separately for individual units confirmed that among  
292 the behavioral factors considered, position was dominant in explaining spiking activity in both areas, while  
293  $\theta_{\text{head}}$  provided the second strongest contribution (fig. 4G). This is also illustrated in Figure 4H, which shows  
294 for each neuron the improvement in encoding when adding  $\theta_{\text{head}}$  or position to models containing all other  
295 behavioral factors. For the vast majority of units in both areas, adding either factor improved encoding  
296 quality, but this difference was larger for position than for  $\theta_{\text{head}}$ . When analyzing the mean improvement  
297 in decoding performance achieved beyond all other predictors, we found that this value was larger for  
298 position (0.048) than for  $\theta_{\text{head}}$  (0.019; all  $p < 10^{-15}$ , Wilcoxon's signed-rank tests) or the other two  
299 covariates. Furthermore, the improvement due to  $\theta_{\text{head}}$  was larger than for these other factors (speed:  
300 0.011;  $p < 10^{-15}$ ;  $\Delta\theta_{\text{head}}$ : 0.008;  $p < 10^{-15}$ , Wilcoxon's signed-rank tests).

301 Both the conditional mutual information and encoding analysis show that neurons can carry  
302 significant information on both factors. However, other factors such as stimulus availability, choice and  
303 reward may have influenced these results, because during track running they are closely associated with  
304 both position and head direction in space and/or time (Zaidel et al., 2017). Re-analysis of conditional  
305 information, now on data in which the period of stimulus presentation  $\pm 1$  s was eliminated, showed a  
306 decrease in the amount of information on  $\theta_{\text{head}}$  conditional on position, which was nevertheless still  
307 significantly larger than 0 for both areas (cMI difference from 0, A1:  $p = 1.7 * 10^{-4}$ , V2L:  $p < 10^{-15}$ , Wilcoxon  
308 signed rank tests; Supplementary Figure 2A, cf. Fig. 4B). Similarly, re-analysis of encoding improvement  
309 with data from which the stimulus presentation period  $\pm 1$  s was eliminated yielded similar results  
310 compared with the original finding (Supplementary Fig. 2B, cf. Fig. 4G). Together, these results suggest  
311 that position and, to a lesser degree, head direction are important drivers of firing activity of neurons in  
312 A1 and V2L. However, we cannot rule out potential contributions to information related to position or  
313 head direction as a result of correlations with additional subject-induced sensations (e.g. eye movements),  
314 which we were unable to detect in the current dataset.

315

### 316 *Coherent mapping of location in A1 and V2L populations*

317 If the neuronal populations in A1 and V2L code the animal's track position, it should be possible to infer  
318 the position of the rat from the collective neuronal activity. We used a Bayesian decoder to test whether  
319 spatial location can indeed be predicted from population activity (sessions with >16 neurons/area were  
320 included). Decoding of position was successful for both A1 and V2L, because the chance that a decoded

321 position matched the true position of the rat was larger than the chance that it matched any other location  
322 on the track (i.e. clear diagonal structure in Fig. 5A, B; A1: n = 15 sessions; V2L: n = 12 sessions). The  
323 distributions of decoding errors, which are the Euclidean distances between the true and decoded  
324 positions, clustered near 0 m for both areas (Fig. 5C). V2L showed, on average, higher proportions of  
325 smaller errors than A1, indicating that decoding spatial position from V2L was more accurate than from  
326 A1 (V2L error: 0.11, 0.10 - 0.42; A1 error: 0.29, 0.26 - 0.37; median and interquartile range, in meters).

327         Increasing the number of neurons included in the decoding analysis decreased the mean decoding  
328 error for both areas. We considered several population sizes, which were similar for both areas (A1: 16-  
329 38 neurons, V2L: 16-40 neurons), but bootstrap analysis showed no signs of plateau performance with  
330 progressive population sizes (Fig. 5D). Although decoding from both areas likely could be improved had  
331 more neurons been recorded, at identical population size decoding performance for V2L was better than  
332 for A1, both for the mean across sessions and for most individual sessions.

333         To investigate whether locations are encoded coherently across both areas, we calculated the  
334 correlation in instantaneous decoding error between A1 and V2L. Instead of only taking the magnitude of  
335 the error into account, errors in the x and y dimensions of the maze were considered separately and their  
336 directionality was preserved. When decoding errors were computed for sessions which contained >16  
337 simultaneously recorded neurons in each area, we found significant correlations ( $p < 0.001$  for all 11  
338 sessions). This was also the case when including all sessions where at least one of the two areas provided  
339 16 neurons, again indicating that A1 and V2L encode locations coherently. However, these correlations  
340 may be confounded if certain locations are represented more accurately than others in both areas, or if  
341 firing patterns are subjected to a common modulation by locomotion speed. To control for these  
342 possibilities, we shuffled the data across time points at which the animal was in the same spatial bin and  
343 running within the same range of speeds. The correlations between the shuffled decoding errors were  
344 significantly lower than the observed correlations (x-direction,  $p = 0.01$ , y-direction  $p = 0.02$ , Wilcoxon  
345 signed-rank test). This difference remained significant when we included all sessions where at least one  
346 area provided 16 neurons (x-direction,  $p = 0.001$ , y-direction,  $p = 0.01$ ). The residual decoding errors,  
347 obtained by subtracting the shuffled distribution from the observed joint distributions, displayed a  
348 diagonal structure (Fig. 5G-H), indicating that representations of location in A1 and V2L remain coherent  
349 even when position cannot be decoded accurately from the population of either area. This coherency  
350 exceeds what would be expected from a common influence of speed. In addition to the mean across  
351 sessions (Fig. 5G-H), these results also held for individual rats (Supplementary Figure S3). It is unlikely that  
352 error correlations can be accounted for by decoding artifacts in sessions with poor decoding performance

353 because there was no evidence of a positive relationship between instantaneous decoding error  
354 correlations and average decoding error, rather their linear correlations were negative and not significant  
355 (Supplementary Fig. 4).

356

## 357 **Discussion**

358 We showed location- and head direction-selective firing patterns in large proportions of neurons in A1  
359 and V2L of freely moving rats navigating a figure-8 maze. This activity takes part in coherent  
360 representations across areas, as indicated by highly correlated firing-field densities (fig. 3A-C), correlated  
361 errors in reconstructed position (fig. 5) and cross-areal noise correlations which varied as a function of  
362 spatial tuning and immediate position (fig. 3D-F).

363 A first implication is that neural representations bound to subject location exist in the sensory  
364 cortex outside the visual system. Such activity may be expected in V2L because of similar observations in  
365 V1 (Fiser et al., 2016; Fournier et al., 2019; Haggerty and Ji, 2015; Ji and Wilson, 2007; Saleem et al., 2018)  
366 and egocentric trajectory correlates in spiking activity of posterior parietal cortex (Krumin et al., 2018;  
367 McNaughton et al., 1994; Nitz, 2006; Whitlock et al., 2012). These areas share anatomical borders with  
368 V2L and bidirectional, monosynaptic connectivity (Haggerty and Ji, 2015; Krumin et al., 2018; McNaughton  
369 et al., 1994; Miller and Vogt, 1984). That A1 neurons also show location-tuning is more surprising, because  
370 A1 activity has hitherto not been associated with animal location. However, in many mammals this area  
371 is required for sound localization (Heffner, 1978; Jenkins and Merzenich, 1984; Kavanagh and Kelly, 1987;  
372 Thompson and Cortez, 1983) and contains neurons tuned to the location of sound sources (Middlebrooks  
373 and Pettigrew, 1981; Town et al., 2017; Wang et al., 2019).

374

### 375 **Nature and function of location-selective firing in sensory cortices**

376 In addition to single or multiple peaks in single-cell firing rates tessellating the entire maze, we found that  
377 A1 and V2L spike patterns were spatially stable across trials and coded significant amounts of information  
378 on animal position (fig. 2 and 3). Our maze harbored repetitive elements requiring the same local  
379 behavior, such as directional body turns or running along straight maze stretches, whereas many cells  
380 showed single firing-rate peaks and thus did not reflect these repetitions (fig. 2). Furthermore, the  
381 encoding analysis revealed animal position as the strongest predictor of A1 and V2L activity, even after  
382 correcting for head direction (fig. 4). Moreover, subject position could be inferred from A1 and V2L  
383 ensemble activity using Bayesian decoding (fig. 5). Despite these indications, we argue that neither our  
384 current findings, nor previous results on V1 (Fiser et al., 2016; Haggerty and Ji, 2015; Ji and Wilson, 2007;

385 Saleem et al., 2018), necessarily imply coding of (allocentric) position *per se*, because proving this would  
386 require additional experimental manipulations to establish that location-selective activity is independent  
387 of the locomotion direction through a location and tolerates manipulation of local sensory cues (Knierim,  
388 2002; Lansink et al., 2012; Leutgeb et al., 2005; Speakman and O'Keefe, 1990; Wilber et al., 2014).

389 We propose the more general alternative that sensory cortical areas integrate modality-specific  
390 evidence with information from other sensory, motor and association areas to generate sequential  
391 representations, which are not merely sensitive to local sensorimotor cues, but also to contextual  
392 elements (which may comprise spatial but also other task-relevant elements such as reward proximity,  
393 task rule execution, etc.). For instance, activation of visual cortex neurons depends on the subject's field  
394 of view, which in turn depends on animal position and head-direction (cf. Haggerty and Ji, 2015). This  
395 combination of view, position and head direction may give rise to a predictive visual representation in the  
396 cortex, which will be compared to further visual input to compute error signals, as posited by predictive  
397 processing models (Fiser et al., 2016; Friston, 2005; Keller and Mrsic-Flogel, 2018; Pennartz et al., 2019;  
398 Rao and Ballard, 1999). Although this proposal needs further testing, it is generally supported by the  
399 literature documenting extensive corticocortical connections (Bizley et al., 2007; Budinger and Scheich,  
400 2009; D'Souza et al., 2016; Felleman and Van Essen, 1991; Gămănuț et al., 2018; Harris et al., 2019;  
401 Laramée et al., 2011; Leinweber et al., 2017), contributions to neural coding in sensory cortices by non-  
402 sensory parameters (Goltstein et al., 2013; Namboodiri et al., 2015; Pakan et al., 2018; Shuler and Bear,  
403 2006) and auditory-visual cortical interactions (Ibrahim et al., 2016; Iurilli et al., 2012; Knöpfel et al., 2019;  
404 Meijer et al., 2020; Meijer et al., 2017; Morrill and Hasenstaub, 2018).

405 This view does not conflict with a potential role for sensory cortices in updating spatial (e.g.  
406 hippocampal) representations in a bottom-up fashion, or with the navigational system contributing to  
407 top-down sensory predictions (Fournier et al., 2020). However, the hypothesis of the hippocampus  
408 causally driving spatial coding in V1 (Saleem et al., 2018) faces the issue that the hippocampus proper  
409 does not directly project to the sensory cortices, and its output is transformed by the synaptic matrices of  
410 intermediate parahippocampal regions on which also non-hippocampal structures converge (Furtak et al.,  
411 2007; Rusu and Pennartz, 2020; Witter et al., 2000). Instead of guiding spatial navigation, the bidirectional,  
412 cortico-hippocampal circuitry may subserve declarative memory consolidation (Eichenbaum, 2000;  
413 McGaugh, 2000; O'Keefe and Nadel, 1978; Rusu and Pennartz, 2020; Squire, 1986). In this process,  
414 distributed neocortical activity selective for parts of a behavioral sequence may form a common 'pointer'  
415 or marker for binding together cross-modal information (Teyler and DiScenna, 1985).

416

#### 417 **Sensitivity to head direction in A1 and V2L**

418 For 33% of neurons in A1 and 49% in V2L, the information conveyed on head direction was significant  
419 after correcting for position (fig. 4B, 4D). As for subject location, this finding relates to how sensory-  
420 specific states coded by A1 and V2L depend on head direction, or how these sensory cortices may use this  
421 sensitivity to emit head direction signals to target areas. Head direction signaling is regulated by the  
422 vestibular nuclei carrying information about the head's motion relative to external space (Cullen, 2014)  
423 and, in rodents, about static neck position (Barresi et al., 2013; Medrea and Cullen, 2013). Vestibular input  
424 is a key contributor to the brain's head-direction system (Taube, 2007), including anterior thalamus  
425 (Taube, 1995), post-subiculum (Taube et al., 1990) and medial entorhinal cortex (Sargolini et al., 2006).  
426 Vestibular information was shown to reach the visual system directly and indirectly, viz. via the  
427 retrosplenial cortex (Vélez-Fort et al., 2018), which was proposed to mediate between the sensory  
428 cortices and the head direction system of the temporal lobe (Page and Jeffery, 2018). Whether head-  
429 direction signaling in A1 and V2L has a causal role in distributing head-direction information to target  
430 areas is up for further research. The collective evidence supports the hypothesis that areas along the  
431 cortical hierarchy may use both allocentric and egocentric representations, with a gradient of egocentric-  
432 to-allocentric processing from sensory to temporal cortices, as also proposed for parietal-retrosplenial  
433 circuitry, where V2L is sometimes included as part of parietal cortex (Chen et al., 2018; Clark et al., 2018;  
434 Wilber et al., 2014).

435

#### 436 **Comparison between primary auditory cortex and secondary visual cortex**

437 We were particularly struck by the broad, qualitative similarities between A1 and V2L spiking patterns.  
438 Both areas showed comparable levels of spatial stability, amounts of firing fields per unit (fig. 2), spatial  
439 distributions of firing fields and noise correlations (fig. 3). Moreover, the contributions to predictions of  
440 firing-rate patterns from position, head direction and other factors were highly similar for A1 and V2L (fig.  
441 4). These observations lend support to the hypothesis that coordinated representations are a general  
442 feature of sensory cortical areas.

443 Neural coding in A1 and V2L also showed interesting quantitative differences, which consistently  
444 point to a higher spatial information content (fig. 2), stronger correlations with location and head direction  
445 (fig. 4) and better position reconstruction in V2L than A1. How this greater accuracy arises in V2L is  
446 unknown, but it may relate to a larger amount of spatially informative visual cues in our maze compared  
447 to auditory cues, and to more consistent changes in visual inputs due to self motion than to (self-induced)  
448 auditory inputs. In view of this greater accuracy, it is interesting to observe the slightly earlier firing in A1

449 than V2L units (fig. 3G). This might reflect the exploitation of potentially faster, subcortical processing of  
450 auditory compared to visual information (Picton et al., 1974).

451

#### 452 **Significance of cross-areal coordination in cortical mapping of location and head direction**

453 Arguably our most novel result is that location-selective representations are highly coherent across  
454 sensory domains of the cortex (fig. 3, 5), suggesting that location- and head direction-sensitive mappings  
455 in auditory and visual cortical systems are not computed independently but are coordinated. Such  
456 coordination of context-dependent sensory mappings offers the computational advantage that evidence  
457 from multiple sensory modalities can be combined to improve estimates of the subject's task-relevant  
458 state, although this comes at the expense of error sharing.

459         Previous studies on auditory-visual interactions were predominantly guided by the theoretical  
460 framework of multisensory cue integration, whereby evidence for the detection of a stimulus in one  
461 modality is augmented by another modality (Fetsch et al., 2013; Meijer et al., 2019; Stein et al., 2014).  
462 Our findings go beyond integration of discrete sensory cues and instantaneous sensory states as they  
463 indicate a cross-modal coordination of context-sensitive representations. In our proposal this common  
464 mapping subserves the construction of a multimodal survey of the subject's current situation, thereby  
465 enabling efficient goal-directed action planning and execution (Pennartz, 2018). As argued by Hawkins et  
466 al. (2017), self-parameters including head direction and position within a task sequence are key priors in  
467 determining how and when to undertake goal-directed actions. In line with predictive processing,  
468 knowledge of these self-parameters is required to interpret novel sensory inputs and anticipate sensory  
469 outcomes of actions (cf. Schürmann et al., 2019).

470



## 471 **Materials and Methods**

### 472 **Experimental design**

#### 473 *Subjects*

474 Experiments were performed on Lister Hooded rats (n=3, Envigo, the Netherlands) at an age between 9  
475 and 40 weeks. All rats were socially housed during behavioral training, but individually housed during  
476 periods of recordings when rats had an implanted tetrode-array, under a normal day/night cycle (lights  
477 on: 8:00am, lights off: 8:00pm). The rat's food intake was restricted such that its weight was at least 85%  
478 relative to the standard growth curve provided by the breeder (Envigo, the Netherlands), corrected for  
479 the deviance in weight between the rat and the curve in the week before the start of food restriction.  
480 Weights were maintained at a stable level after rats reached healthy, adult body weight (Clemens et al.,  
481 2014; Newby et al., 1990). Rats had *ad libitum* access to water throughout the experiment. All experiments  
482 were performed in accordance with the National Guidelines on Animal Experiments and were approved  
483 by the Animal Experimentation Committee of the University of Amsterdam.

484

#### 485 *Behavioral setup*

486 Rats were trained to discriminate between auditory and/or visual stimuli on an automated, rectangular  
487 figure-8 shaped track (92 cm x 73 cm) which was raised 55 cm off the ground (fig. 1A). The track's alleys  
488 were made of black painted aluminum (width = 8.7 cm) and contained raised edges (1.0 cm). At the front  
489 of the track, two LCD monitors (Iiyama ProLite B2776HDS) and two audio speakers (Audaphon Neo CD  
490 3.0) were available for stimulus presentation. The monitors were positioned symmetrically from the  
491 center of the track and the speakers were located above the top-left and top-right corners of the left and  
492 right monitors, respectively. During early training stages, transparent polycarbonate walls lined the  
493 central alley to prevent the rat from prematurely exiting this alley. Additionally, two transparent  
494 polycarbonate sliding doors were positioned at the front and back of the central alley. The walls and door  
495 at the front of the central alley contained small holes to allow for perception of the auditory stimuli. Two  
496 reward wells were positioned at the left and right edges of the track's front alley. An additional reward  
497 well was positioned in the central alley, towards the front-end T-junction. Fluid sucrose solution (15% in  
498 tap water) was delivered to the wells by syringe pumps (Razel, VT, USA). All reward wells contained  
499 infrared photodetectors to detect nose pokes and licks. The motor activity of the rat on the track was  
500 registered with additional photodetectors, located near the T-junctions at the front and back ends.

501 The track was entirely computer controlled, obviating the need for human interventions during  
502 the experiment, and was interfaced with the recording system to ensure synchronized time stamping of

503 behavioral events and neuronal activity patterns. It was positioned in an enclosure of black curtains (2.8  
504 x 2.2 m) within a sound-attenuated room of 3 x 3 m. The room was dimly lit by a small LED light pointed  
505 towards the ceiling. The experimenter observed training and experiments from an adjacent room to  
506 minimize interference with the rats' behavior.

507

#### 508 *Stimuli*

509 On each trial of the behavioral task, rats had to discriminate between a target stimulus, displayed on one  
510 of the screens and/or the adjacent speaker, and a distractor stimulus, appearing on the other screen  
511 and/or speaker (Fig. 1B). Target and distractor were either unisensory (visual or auditory) or multisensory  
512 (audiovisual) and differed in stimulus amplitude. Three types of target/distractor combinations were in  
513 equal proportions presented to the rat; large-difference unisensory trials (1/3), small difference  
514 unisensory trials (1/3) and small difference cross-modal trials (1/3). In a separate session for each rat, the  
515 threshold amplitude differences (i.e. the amplitude differences at which the rat shows a correct response  
516 in 50% of the stimulus presentations) were determined using a staircase procedure. On the basis of this  
517 data, stimulus parameters were set for each rat such that the discrimination performance for the large-  
518 difference unisensory trials was >70% correct and for the small-difference unisensory trials was >50%  
519 correct. The stimulus settings remained the same for all recording sessions of a rat. The amplitude  
520 differences for the stimulus components in the audiovisual trials were identical to the differences for the  
521 small-difference unimodal stimuli of the same session. The specific screens (left or right) at which target  
522 and distractor were displayed were pseudorandomly selected for each trial, such that the target stimulus  
523 was never displayed more than four successive trials at the same side and the difference in left and right  
524 target-presentations across the session was not more than 4.

525 Visual stimuli were full-screen, upward-moving, black-and-white checkerboards (0.1  
526 cycles/degree, 4 cycles/second; fig. 1B). When no visual stimuli were displayed, a grey background was  
527 visible. All visual stimuli and the background were gamma corrected and had the same overall luminance  
528 as measured with a photometer. Contrast values between light and dark checkers varied between 0 and  
529 1, in which 0 indicates no contrast and 1 indicates the maximum contrast possible with the monitor at its  
530 lowest brightness setting.

531 Auditory stimuli were composed of white noise, which was band-passed between 10 and 25 KHz.  
532 When auditory stimuli were absent, background noise was played. Background noise was white noise  
533 band-passed between 8 and 12 KHz. For auditory stimuli, the difference between target and distractor  
534 was in the relative volume between the speakers. Relative auditory volume ranges between values of 0

535 and 1, with 0 and 1 indicating that the volume is fully accounted for by one or the other speaker.  
536 Background noise was played with a contrast of 0.5, i.e. identical volume through both speakers.  
537 Therefore, at every moment during the session, sound was playing at the same volume, which was set to  
538 76 dB at the central reward well.

539

#### 540 *Behavioral training*

541 After rats had learned to complete unidirectional laps on the track and to nose-poke for a duration of 1  
542 second to earn reward, they were trained to discriminate between target and distractor stimuli and to  
543 respond by choosing the side at which the target stimulus was present. When the front door opened at  
544 the start of the trial, the target visual stimulus was presented on one screen (i.e. on one side of the track)  
545 while the other screen maintained the grey background. The rat earned a reward if it poked in the well at  
546 the side of the track corresponding to where the stimulus was displayed. The stimulus presentation lasted  
547 until 3 seconds following reward delivery, with the aim of strengthening the stimulus-response-outcome  
548 association. When the rat made a nose poke at the incorrect side, stimulus presentation stopped  
549 immediately. From this stage onwards, the length of the nose pokes to start stimulus presentation was  
550 increased incrementally from 0 to 0.5-1.5 seconds (randomized across trials). If the rat performed at least  
551 60 trials within 60 minutes with 70% correct trials on three out of five consecutive days, stimuli switched  
552 from visual to auditory. If this criterion was met also for auditory stimuli, subsequent sessions included  
553 audio, visual stimuli and audio-visual stimuli in equal proportions and presented according to the  
554 pseudorandom schedule (see *Stimuli*). In multisensory trials, the auditory and visual stimulus components  
555 were always presented on the same side of the track; i.e. no sensory conflicts were created. Once the rat  
556 reached the same criterion with these three trials types included in the session, the discrimination  
557 problem was made progressively more difficult, by introducing distractor stimuli and lowering the  
558 contrast of visual target stimuli in subsequent sessions. The difference in amplitude between target and  
559 distractor stimuli was gradually decreased over training sessions but never below the level described  
560 above for 'low-difference stimuli'. In parallel with the increase in difficulty, the display time of the stimuli  
561 was progressively shortened until the stimulus duration was 2-3 s. To prevent rats from developing  
562 habitual or stereotyped response preferences, extra sessions were occasionally included in the training.  
563 In these sessions, rats were allowed to collect reward from the correct well after sampling the incorrect  
564 well. After an incorrect nose poke, trials continued until the correct well was sampled. These sessions did  
565 not count towards criterion performance.

566 In the final task, the trial procedure was similar to training stage 4 and now the small and large  
567 difference unimodal stimuli were presented alongside with the crossmodal stimuli (see *Stimuli*). To  
568 ensure enough trials were performed in all conditions to allow statistical comparison, each session  
569 contained either visual or auditory unimodal trials, in addition to multisensory trials. Recordings  
570 commenced when rats consistently performed at criterion level: >60 trials in 60 minutes with >70%  
571 correct on large-difference unimodal stimuli and above chance level for small difference unimodal stimuli  
572 and multisensory stimuli.

573

#### 574 *Tetrode array and surgical procedure*

575 A custom-made, 128 channel tetrode-array was implanted over the right hemisphere of three rats (Bos et  
576 al., 2017; Lansink et al., 2007). Four bundles of 8 individually moveable tetrodes each were targeted to  
577 primary auditory cortex (A1, -4.4 mm AP, 6.8 mm ML, -4.4 mm DV), lateral secondary visual cortex (V2L, -  
578 5.8 mm AP, 6.0 mm ML, -2.6 mm DV), hippocampal area CA1 (CA1, -3.6 mm AP, 2.4 mm ML, -2.6 mm DV)  
579 and perirhinal cortex area 36 (PRH, -4.4 mm AP, 6.8 mm ML, -7.0 mm DV). Hippocampal and perirhinal  
580 data were not used in the current study. Thirty minutes before surgery, rats received the analgesics  
581 meloxicam (Metacam, 2mg/kg) and buprenorphine (Buprecare, 0.04 mg/kg) subcutaneously, as well as  
582 the antibiotic enrofloxacin (Baytril, 5mg/kg). Anesthesia was induced using 3% isoflurane in oxygen and  
583 maintained with 1-2% isoflurane. Animals were mounted in a stereotaxic device (Kopf; Tujunga, CA, USA)  
584 and placed on a heating pad to maintain their body temperature. A single craniotomy was made such that  
585 the points at which the bundles entered the brain were positioned relative to bregma at -5.4 mm AP and  
586 2.8 mm ML (A1), -5.9 mm AP and 4.0 mm ML (V2L), -3.6 mm AP and 1.7 mm ML (CA1) and -3.5 mm AP  
587 and 3.8 mm ML (PRH). Six screws were placed into the skull, with the screw positioned over the frontal  
588 bone serving as electrical ground for the tetrode array. The hyperdrive was positioned such that the  
589 bottom of the bundles touched the cortical surface. The craniotomy was then sealed using silicone  
590 adhesive (Kwik-Sil) and dental cement was used to fix the hyperdrive and screws to the skull. Post-  
591 operative care consisted of subcutaneous injections of the analgesic meloxicam (2 days) and Baytril  
592 antibiotic (1 day) and application of wound healing ointment (Acederm, Ecuphar, Breda, Netherlands). On  
593 post-operative days 1-3, rats received 10 g of extra food softened in water to facilitate consumption.  
594 Tetrodes were gradually lowered to their target regions across the first week after surgery. During  
595 recordings their depth was estimated from the number of turns to the guiding screws and from the online  
596 Local Field Potential (LFP) profiles.

597

## 598 *Data acquisition and preprocessing*

599 Spikes and LFPs were recorded using tetrodes (Gray et al., 1995)(nichrome, California Fine Wire, 16  $\mu$  per  
600 lead, gold-plated to an impedance of 500-800 KOhm) using a Neuralynx Digitalynx SX recording system  
601 (Neuralynx, Bozeman MT). Raw signals were buffered using four 32-channel unity-gain head stage  
602 amplifiers before being passed through an automated commutator (Neuralynx, MN). Each of the four  
603 tetrode bundles contained an additional electrode that served as a reference channel and which was  
604 positioned in the white matter near the tetrode bundle. The recorded signals were the raw signals with  
605 the reference signal subtracted. For spike recordings, signals were band pass filtered between 600 and  
606 6000 Hz. Putative spikes were recorded for 1 ms (16 bit, 32KHz) from all leads of a tetrode whenever the  
607 signal on any lead of that tetrode crossed a predefined threshold. LFPs were low-pass filtered below 300  
608 Hz and recorded continuously (16 bit, 3.2 KHz). The behavior of the rat was tracked by a ceiling-mounted  
609 camera (at 720 by 576 pixels, 25 fps) and timestamped by the Digitalynx SX.

610 Spikes were attributed off-line to putative single units (clusters) using the KlustaKwik automatic  
611 clustering algorithm (Kadir et al., 2014) followed by manual refinement (MClust 3.5). Waveform features  
612 used for clustering were energy, the first derivative of the energy, the overall peak height and the peak  
613 height during samples 6-11 where the action potential peak is expected. Clusters were included for further  
614 analysis based on a combination of quality metrics (Schmitzer-Torbert et al., 2005): L-ratio ( $< 0.2 - 0.8$ ),  
615 isolation distance ( $> 15 - 24$ ) and interspike interval (1.2ms) violations ( $< 0.1\% - 0.5\%$ ).

616

## 617 *Histology*

618 Following the last recording session animals were anesthetized using Isoflurane and electrolytic lesions  
619 were made at each tetrode tip by passing current (18 uA for 2s) through two leads of each tetrode. At  
620 least twenty-four hours later, the animal was deeply anesthetized with an intraperitoneal injection of  
621 Nembutal (1.0 ml, sodium pentobarbital, 60 mg/ml, Ceva Sante Animale, Maassluis, Netherlands) and  
622 transcardially perfused with 0.9% NaCl solution, followed by perfusion of a 4% paraformaldehyde solution  
623 (pH 7.4 phosphate buffered). The brain was extracted and placed in 4% paraformaldehyde solution for at  
624 least 24 hours post-fixation, after which 40  $\mu$ m transverse sections were made using a vibratome. These  
625 were stained with Cresyl Violet which allowed reconstruction of tetrode tracks and their endpoints  
626 marked by electrolytic lesions (Paxinos and Watson, 2007)(Supplementary fig. 1). Because it was not  
627 possible to determine with absolute certainty how each endpoint corresponded to the identity of  
628 individual tetrodes, the considered neuronal pools likely contain a small subset of units recorded in the  
629 vicinity of the target locations. Based on the average number of neurons included from the respective

630 recording sessions for A1 and V2L, the estimated number of neurons recorded outside their target areas  
631 was 16 for V2L and 32 for A1.

632

### 633 **Statistical Analysis**

#### 634 *Statistical procedures*

635 Unless specified otherwise all statistics were performed using linear mixed models (LMMs) or generalized  
636 linear mixed models (GLMMs) in MatLab (MathWorks, Natick, MA), depending on the distribution of the  
637 data. All reported statistical quantities (group means, regression slopes, confidence intervals etc.) were  
638 derived from the (G)LMMs. All reported confidence intervals are 95% prediction intervals. To estimate the  
639 denominator degrees of freedom (DF2) for F-tests, the Satterthwaite approximation was used for LMMs  
640 and the residual degrees of freedom for GLMMs. To correct for multiple comparisons, p-values are  
641 adjusted using the Holm-Bonferroni method where applicable {Holm, 1979 #172}(fig. 2H, 3E-F).

642

#### 643 *Inclusion criteria*

644 Behavioral performance was measured as the percentage of correct responses to stimulus presentation  
645 in a session. Sessions were included for analysis only if the performance was above 95% of a distribution  
646 of performance expected from sessions with an equal number of trials and chance performance (50%  
647 correct trials). Additionally, to exclude sessions where animals had a preference for a particular response  
648 direction, sessions were included only when responses to both left and right stimuli were performed  
649 above chance using the same procedure.

650

#### 651 *Z-scored spiking activity and firing rates*

652 Spike trains of individual units were binned into 1 ms temporal bins and smoothed with an exponential  
653 window with a time constant of 150 ms. Z-scored spiking activity was calculated by subtracting the mean  
654 from the smoothed spike train and dividing the result by the standard deviation.

655

#### 656 *Position tracking and 2D rate maps*

657 The location of the rat's body and head were determined separately for each frame of recorded video  
658 using custom scripts made with Bonsai Editor (Lopes et al., 2015). Frames with erroneously assigned  
659 positions were manually corrected. The raw tracking data was smoothed using the *smooth()* function in  
660 Matlab using the '*rlowess*' method and a span of 5 pixels. Head direction was determined for each video  
661 frame as the angle of the body-head axis of the rat with respect to the left-to-right axis of the setup.

662

663 Rate maps were constructed in 2D by spatially binning (bin size = 10 by 10 pixels or 4.2cm<sup>2</sup>) the smoothed  
664 spike trains of single units into the spatial bin occupied by the rat in each videoframe, summing the firing  
665 rates per bin and then averaging over the time spent in each bin (occupancy). Binned spike trains and  
666 occupancy maps were independently smoothed by convolution with a 2D Gaussian (std = 1 bin) before  
667 averaging. Time segments in which the running velocity of the rat was < 6 cm/s were excluded.

668

### 669 *Linearization of position data and 1D rate maps*

670 The goal of linearizing position data is to allow more powerful analyses relating localized spiking activity  
671 to behavior. The lateral range of body motion on the track was limited, and the firing fields observed on  
672 the 2D rate maps generally spanned the full width of the track. Linearization therefore allows to focus on  
673 the spatial dimension containing the majority of the rate map structure. Linearization of the rat's position  
674 was achieved by first determining the average path of the rat across the setup for each recording session.  
675 This was achieved by manually tracing the locations with highest occupancy of each session's occupancy  
676 map. The starting point of the linearized track was chosen as the starting point of the right alley segment  
677 at the three-way junction at the front of the setup (FC; fig. 1A). The linearized track then consisted, in this  
678 order, of the right side of the track, central alley, left side of the track. The end position was the center of  
679 the back-alley segment at the three-way junction. The linear position was then determined as the point  
680 along this linearized track closest to each observed 2D position. Raw linearized position was smoothed by  
681 convolution with a Gaussian with standard deviation of 2 pixels (0.4 cm). Linear speed was then calculated  
682 from the linear location using the *gradient()* function in MatLab, and linear acceleration was calculated  
683 similarly from linear speed. Finally, because the linearized track length varied slightly between rats, linear  
684 location was normalized to the mean length across animals (334 cm). Linear rate maps were made  
685 similarly to the 2D rate maps but using the linear position data, using the same inclusion criteria and  
686 smoothing parameters and with a bin size of 16 pixels (3.3 cm). Joint rate maps (fig. 3A-B) were  
687 constructed from the linear rate maps of each neuron by normalizing each rate map between 0 and 1,  
688 and then sorting all rate maps of all sessions and rats by the location of the peak firing rate (dark red in  
689 fig. 3A).

690

### 691 *Firing fields*

692 The procedure for determining the location of firing fields was similar to the method described by  
693 (Haggerty and Ji, 2015), using the unit's linear rate map as a basis. First the rate map was smoothed using

694 the *smooth()* function in Matlab (MathWorks, Natick, MA) with the '*rlowess*' method and a span of 5 bins.  
695 The baseline firing rate was determined as the 40<sup>th</sup> percentile of this smoothed rate map. The baseline  
696 was subtracted from the rate map and local maxima were determined for the baseline-corrected rate  
697 map. Local maxima were kept for further processing if the rate was > 1Hz and > 0.2x the baseline rate.  
698 Field boundaries were determined as the bins nearest to a peak where the firing rate was < 10% of the  
699 peak firing rate. This procedure sometimes produced very small fields near or on the slope of larger fields  
700 ('shoulders'). Such shoulders were discarded if the border of the field was two or fewer bins apart  
701 (<=6.6cm) from the border of a taller field, unless it was two or more bins (>=6.6cm) away from its own  
702 border and the peak was > 1.5 times the value at this border. After the removal of spurious small fields,  
703 the borders of remaining fields were extended to the bins where the activity fell below the peak cut-off  
704 of 1 Hz and 0.2 times the baseline rate, or until they reached the border of another peak. This procedure  
705 was followed for each single unit from the tallest to the lowest peak. Single fields that spanned the T-  
706 junctions at the front and back of the experimental track were prevented from being detected as two  
707 separate fields by considering the bins of the linear rate maps that border the T-junctions as adjacent.

708

#### 709 *Spatial Stability*

710 The spatial stability of the localized firing of individual units was determined using a permutation analysis.  
711 First, separate linear rate maps of each individual trial were constructed, similarly to the procedure  
712 described above, except that the data was split into leftward and rightward trials. The correlation between  
713 a single-trial rate map and the rate maps of all other trials on the same side of the track was computed  
714 (Pearson correlation), for each trial and then the average correlation coefficient was computed. These  
715 steps were repeated for 1000 shuffled versions of the spiking data. For each shuffled iteration, the spiking  
716 data was temporally rotated within a single trial by a random number of samples (Louie and Wilson, 2001).  
717 This method of shuffling leaves the temporal structure of spiking patterns largely intact. Positions and  
718 spikes emitted during periods of immobility (<0.06 cm/s) were excluded from analysis. A unit was  
719 considered spatially stable if its average single-trial rate map correlation, for both left- and rightward laps,  
720 was higher than 95% of the distribution of average, shuffled single-trial rate map correlations of the  
721 corresponding side. To calculate the spatial stability index, the mean of the distribution of average,  
722 shuffled single-trial rate map correlations was subtracted from the average observed single-trial rate map  
723 correlation; the result was divided by the standard deviation of the shuffled distribution. This procedure  
724 was done for each unit for both left- and rightward trials and the reported spatial stability index was the  
725 mean of those two.



726 The probability of the spatial stability of a unit was modeled using a GLMM with link function  
727  $g(P_{stable}) = \ln(P_{stable})$  and the equation:

728

$$729 \quad P_{stable} \sim Area + (1 + Area|Subject)$$

730

731 Where *Area* is a categorical variable indicating the cortical area where the unit was recorded and *Subject*  
732 is a categorical variable indicating from which experimental subject the data originated.

733

#### 734 *Spatial information*

735 Spatial information (SI) for each unit was calculated from the linearized location data and firing rate  
736 following Skaggs et al. (1992):

$$737 \quad SI = \sum_{i=1}^N P_i \frac{X_i}{r} \log_2 \frac{X_i}{r}$$

738 Where  $P_i$  is the probability of finding the animal in bin  $i$ ,  $X_i$  is the sum of the firing rates observed when  
739 the animal was found in bin  $i$ ,  $r$  is the mean spiking activity of the neuron and  $N$  is the number of bins of  
740 the linearized trajectory (104). The SI for each unit was modeled with a GLMM using a gamma distribution  
741 with link function  $g(SI) = SI^{-0.01}$  and the equation:

742

$$743 \quad SI \sim Area + (1 + Area|Subject)$$

744

#### 745 *Correlating firing field densities*

746 Firing field densities were calculated per rat by first determining for each linear spatial bin the number of  
747 firing fields, across all units, in which this bin took part. Then this number was divided by the subject's  
748 total number of fields. The average firing field density is reported as the mean of the field densities for  
749 the individual rats. Firing field densities of A1 and V2L were correlated with an LMM using the equation:

750

$$752 \quad Density_{A1} \sim Density_{V2L} + (1 + Density_{V2L}|Subject)$$

751

#### 753 *Linear regression of spiking activity on behavioral covariates*

754 Linear regression was used to determine whether firing field correlations between A1 and V2L could be  
755 explained by similar linear dependencies between single unit firing rates and behavioral covariates. The

756 instantaneous, z-scored spiking activity of each unit was regressed on linear running speed, acceleration,  
757 head direction and change in head direction (angular velocity) using the general linear model:

758

$$759 \quad Z \sim Spd + Acc + Sin_{HD} + Cos_{HD} + \omega_{HD}$$

760

761 Where  $Z$  is the instantaneous, z-scored spiking activity,  $Spd$  is linear speed,  $Acc$  is linear acceleration,  
762  $Sin_{HD}$  and  $Cos_{HD}$  are the sine and cosine of head direction and  $\omega_{HD}$  is the angular velocity in head  
763 direction. The model residuals of each unit were used to produce linear rate maps and subsequently  
764 determine firing fields without linear dependencies on the behavioral covariates.

765

#### 766 *Stimulus responsiveness*

767 The responsiveness of a unit to the sensory stimuli was assessed by statistically comparing the mean, z-  
768 scored firing rates of the time intervals of [350 – 50] ms pre-stimulus onset and [0 – 300] ms post-stimulus  
769 onset using Wilcoxon’s signed-rank test (alpha = 0.05). A subset of units gradually increased or decreased  
770 firing rates before stimulus onset (“ramping activity”), without showing a change in spiking activity at  
771 stimulus onset. To preclude that such activity would erroneously be considered as significantly stimulus  
772 responsive, only units with a stable pre-stimulus onset firing rate were considered; i.e. the unit’s firing  
773 rates between [1000-700 ms] and [350-50] ms pre-stimulus onset were required to be similar (Wilcoxon  
774 signed rank test,  $P > 0.05$ ). The probability of a unit’s responsiveness to stimuli was modelled using a  
775 GLMM with link function  $g(P_{resp}) = \ln(P_{resp})$  and equation:

776

$$777 \quad P_{resp} \sim Area * Modality + (1 + Area + Modality | Subject)$$

778

779 Where *Modality* is a categorical variable indicating the modality (auditory or visual) of the stimulus being  
780 considered.

781

#### 782 *Noise correlations*

783 Rate map similarity between neurons was first determined for each pair of units as the Pearson correlation  
784 coefficient of their linear rate maps. To determine noise correlations, we first temporally binned the  
785 instantaneous, z-scored spiking activity into 10 ms bins and then subtracted from that the mean spiking  
786 activity at the linear spatial bin occupied by the rat at each instant. This difference constitutes  
787 instantaneous variability in spiking activity not predicted by spatial position. Additionally, for each pair of

788 units we categorized locations along the track as i) occurring in a firing field of both units (“shared field  
789 bin”), ii) occurring in a firing field of only one of the units (“one-field bin”) or iii) occurring outside of firing  
790 fields of both units (“out of field bin”). For each pair of units we calculated noise correlations as the  
791 Pearson correlation coefficient of the instantaneous variability of the activity of two units, and we did so  
792 separately for each of the three bin types.

793 Analysis proceeded with pairs showing significant noise correlations, determined via comparison  
794 to shuffled distributions of these correlations. These distributions were made by computing noise  
795 correlations after shuffling samples of spiking activity within the same linear spatial bin and repeating this  
796 procedure 5000 times. A pair was considered significantly correlated if its actual correlation exceeded  
797 99% of the shuffled distribution for at least one of the three location types.

798 For significantly correlated pairs, mean noise correlations across location types, were regressed  
799 on their rate map correlations with an LMM using the equation:

800

$$801 \quad R_{MN} \sim R_{RM} * Type_{pair} + (1 + R_{RM} + Type_{pair} \mid Subject)$$

802

803 Where  $R_{MN}$  is the mean noise correlation of a pair across location types,  $R_{RM}$  is the rate map correlation  
804 and  $Type_{pair}$  is the type of pair (A1-A1, V2L-V2L or A1-V2L). Here we used the mean noise correlation  
805 across location types rather than the overall noise correlation since the latter suffers from sampling bias  
806 if noise correlations for different location types are not equal, because pairs with high rate map  
807 correlations contribute more samples from shared field bins and out of field bins than from one-field bins.

808 To compare noise correlations between cell-pair types and location types we used an LMM with  
809 the equation:

$$810 \quad R_{Noise} \sim Type_{pair} * Type_{Bin} + (1 + Type_{pair} + Type_{Bin} \mid Subject)$$

811

812 Where  $R_{noise}$  is the average noise correlation for a unit pair at one of the three location types and  $Type_{bin}$   
813 is a categorical variable indicating the location type.

814

### 815 *Cross-correlogram*

816 Cross-correlations of A1 – V2L unit pairs were computed from the z-scored spiking activity of all spatially  
817 stable units, during periods with running speed > 0.06 m/s. Spiking activity was first binned in 10 ms bins.  
818 The mean spiking activity observed in the spatial bin occupied by the rat at each instant was then  
819 subtracted from the spiking activity in order to prevent the relative spatial positions of firing fields of two

820 units from biasing the shape of the cross-correlogram. In doing so, the cross-correlation only considered  
821 activity fluctuations with respect to the mean activity observed at each location. Histograms were made  
822 of the distribution of cross-correlogram peak lags for each animal individually, which were then averaged  
823 to produce the histogram shown in fig. 3G.

824

#### 825 *Information theoretic analysis*

826 For the information theory-based analyses, linear spatial bins of ~16.4 cm were used, such that the  
827 linearized track was divided into 21 bins. As predictors we used running speed, head direction ( $\theta_{\text{head}}$ ) and  
828 head direction change ( $\Delta\theta_{\text{head}}$ ). Running speed and  $\theta_{\text{head}}$  were calculated as described above, and  $\Delta\theta_{\text{head}}$   
829 was calculated as the degrees per second change in  $\theta_{\text{head}}$ . The predictors were binned in 21 equipopulated  
830 bins to match the number of location bins. Spike counts were binned in 300 ms time bins, and instances  
831 with running speed < 0.1 m/s were excluded. Discrete mutual information (MI) and discrete conditional  
832 mutual information (cMI) were computed using the Java Information Dynamics Toolkit (JIDT)(Lizier, 2014).  
833 Bias due to finite sample sizes was corrected by generating for every computation of MI and cMI a  
834 population of 500 surrogates. When creating the surrogates, only spike count vectors were shuffled, such  
835 that the relationship between the target and conditional predictor (in the case of cMI) was preserved. The  
836 MI and cMI values reported are the differences between the observed values and the average of the  
837 surrogate populations. Differences in MI between A1 and V2L were statistically assessed using Mann-  
838 Whitney's U test. The p-value of cMI values of individual units was computed as the fraction of the  
839 surrogate dataset which had information values higher than the observed one. To correct for multiple  
840 comparisons, a Bonferroni correction was applied across all neurons and tested at the 0.05 significance  
841 level. Reported confidence bounds correspond to 95% bootstrap confidence intervals, computed with the  
842 Seaborn Python library (v0.9.0, 2018).

843

#### 844 *Encoding: predicting spike trains from behavioral variables*

845 First, the position of the rat was taken as the two-dimensional variable with x- and y-coordinates with a  
846 resolution of 0.205 cm/pixel recorded by the system without further binning. Encoding was performed  
847 with a random forest encoder using 100 trees and 5-fold cross-validation with randomized folds (Benjamin  
848 et al., 2018). Encoding over time was performed using continuous folds to preserve the order in time.  
849 Encoding quality was measured with the Poisson pseudo- $R^2$  score and averaged over folds. Statistical  
850 comparisons of encoding quality for individual predictors, and comparisons of improvement in encoding  
851 quality above all other predictors, were made using Wilcoxon's signed-rank test and used the average of

852 the A1 and V2L (improvement in) encoding quality for each predictor. Reported confidence bounds  
853 correspond to 95% bootstrap confidence intervals, computed with the Seaborn Python library (v0.9.0,  
854 2018).

855

### 856 *Decoding of animal position*

857 The position of the rat was decoded from the neuronal data recorded from A1 or V2L if a session included  
858 at least 16 neurons from that area showing a rate map peak > 2Hz; only those neurons were included for  
859 each session. This number was determined to provide a balance between decoding quality and number  
860 of included sessions. Spikes were binned in 400 ms bins, and the true position (i.e. the actual position of  
861 the rat on the track) at every timeframe was assigned to a spatial bin on the linearized track (total of 35  
862 bins, bin size ~9.8 cm). When the linear position changed spatial bins within a temporal bin, the position  
863 was assigned to the spatial bin which occurred most often within the temporal bin. Running speed was  
864 linearly interpolated at the centers of the temporal bins. Samples with speed < 0.1 m/s and with spike  
865 count < 5 were excluded. A Bayesian classifier was employed to predict the spatial bin occupied by the rat  
866 on the basis of the temporally binned neural data (Davidson et al., 2009). A 5-fold cross-validation routine  
867 with shuffling was used, with identical shuffling (i.e. similar sized training set for each fold) across the two  
868 areas for a given session.

869 Decoding errors were used as a main metric for decoding performance and computed as the  
870 Euclidian distance between the centers of the true and the decoded spatial bin in 2D space. Pearson  
871 correlations of instantaneous decoding errors between the two cortical areas in time were calculated to  
872 assess whether A1 and V2L encoded the same position. This was performed separately for the error in the  
873 x-direction and that in the y-direction in 2D space, to preserve the directionality of the error in addition  
874 to its magnitude.

875 Instantaneous error correlations resulting from these computations were compared with error  
876 correlations computed following shuffling of the errors within the same spatial bin and running speed  
877 range (Saleem et al., 2018). Running speed bins were defined per session by taking the full range of speeds  
878 and subdividing it into 5 equipopulated bins. Significance of differences in error correlations before and  
879 after shuffling were tested using Wilcoxon's signed-rank tests. Joint error density maps for A1 and V2L  
880 were computed for the error correlations of recorded and shuffled data and for the x- and y-direction  
881 separately. Joint error density maps were averaged across all included sessions and smoothed with a  
882 Gaussian filter with a standard deviation of 4 spatial bins. The relative probability of observing an error of

883 a particular size and direction in the recorded versus shuffled data was calculated by taking the difference  
884 between the actual and shuffled joint density maps and dividing by the shuffled map.

885 A bootstrapping procedure was performed for testing how the decoding performance depended  
886 on the size of the population. First, for each included session, 50 unique, random groups of units were  
887 selected for each ensemble size (ranging from 5 to the maximum number of units in each session minus  
888 one). Then, the decoding analysis was performed for each group before averaging decoding performance  
889 across the groups. For the largest ensembles, with one fewer unit than the session total, it was not  
890 possible to create 50 unique groups. For these ensembles some groups were included twice. Cross-  
891 validation was performed for every group by splitting the data into a training set (80%) and test set (20%),  
892 with identical shuffling across all groups of a session.

893 To exclude the possibility that the observed correlations in instantaneous decoding errors are a  
894 result of decoding artifacts in sessions with poor decoding, Pearson's correlation was computed for the  
895 average decoding errors and the correlation in instantaneous decoding errors across sessions, for A1 and  
896 V2L average errors separately and for instantaneous errors in the X- and Y-directions separately.

897

#### 898 **Seaborn Python reference (no journal article associated)**

899 v.0.9.0 DOI 10.5281/zenodo.1313201, 2018

900

#### 901 **Conflict of interest statement**

902 The authors declare no financial or non-financial competing interests.

903

#### 904 **Acknowledgements**

905 This study was financially supported by Netherlands Organization for Scientific Research VENI Grant  
906 863.11.010 to C.S.L. and by the European Union's Horizon 2020 Framework Program for Research and  
907 Innovation under the Specific Grant Agreement No. 945539 (Human Brain Project SGA3). We thank  
908 Kenneth D. Harris and A. David Redish for the availability of unit isolation software KlustaKwik and MClust,  
909 respectively. We also gratefully acknowledge the use of a Seaborn Python library in our study (v0.9.0, DOI  
910 10.5281/zenodo.1313201, 2018). The work of the Technology Center at the University of Amsterdam for  
911 building the recording setup and the tetrode microdrives is highly appreciated.

912

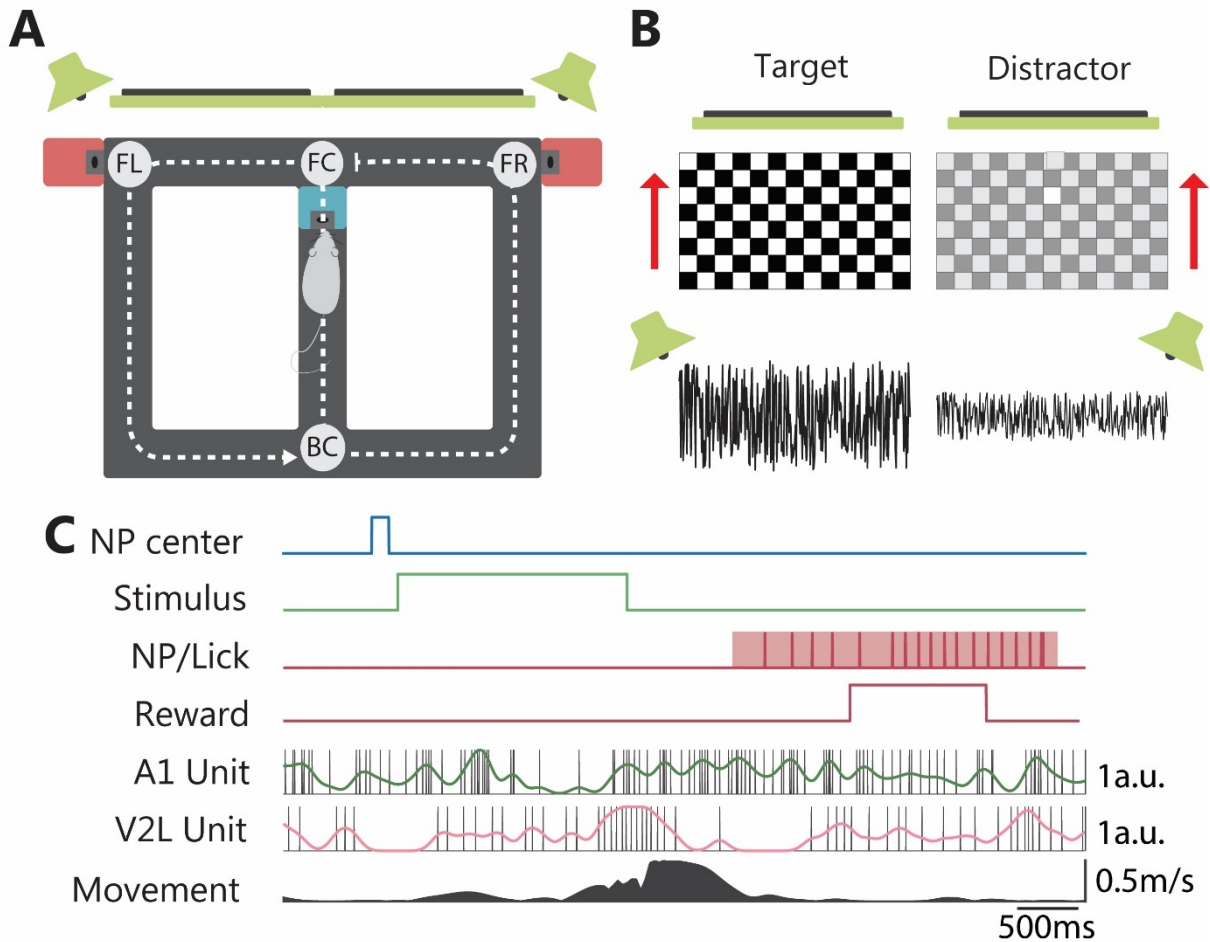

913

914

915 **Figure 1: Behavioral apparatus and task. (A)** Rats performed a discrimination task on an automatized  
 916 figure-8 track, which was located in a dark, sound-attenuated laboratory room without other salient visual  
 917 cues. At the front center T-junction (FC), rats responded to audio-visual stimuli presented from 2 screens  
 918 and 2 speakers located in front of the track (green) by running to the track's side corresponding to where  
 919 the most salient stimulus was presented. Rats were rewarded for a correct response with sucrose solution  
 920 at the ports to the sides of the front alley (pink squares). The dotted line indicates how the track was  
 921 linearized for analysis. FL: front left, FR: front right, BC: back center. **(B)** Example of a set of stimuli. Stimuli  
 922 were visual (moving checkerboard), auditory (filtered white noise) or audiovisual. In multisensory trials,  
 923 target auditory and visual stimuli were always presented at the same side of the track. The rat had to  
 924 respond to the most salient stimulus (highest contrast and/or volume) and discard the distractor stimulus  
 925 (which was less salient). **(C)** Trial layout and example A1 and V2L spike trains during seven seconds of a  
 926 leftward trial with a correct response. NP center: blue line indicates the timing of the nose poke (NP) in

927 the central well to initiate stimulus onset. Stimulus: the time interval during which the stimulus was  
928 presented (2s; green line). NP/Lick: the time of the rat's nose poke into the left reward well is indicated  
929 by the red shaded area and the individual licks by the vertical tick marks. A1 / V2L Units: Single unit spikes  
930 are indicated by the black vertical tick marks, whereas solid lines indicate Gaussian-smoothed spike trains.  
931 Firing rates are observed to fluctuate in relation to stimuli and locations across the maze. Movement:  
932 speed of the rat along the linear trajectory.  
933



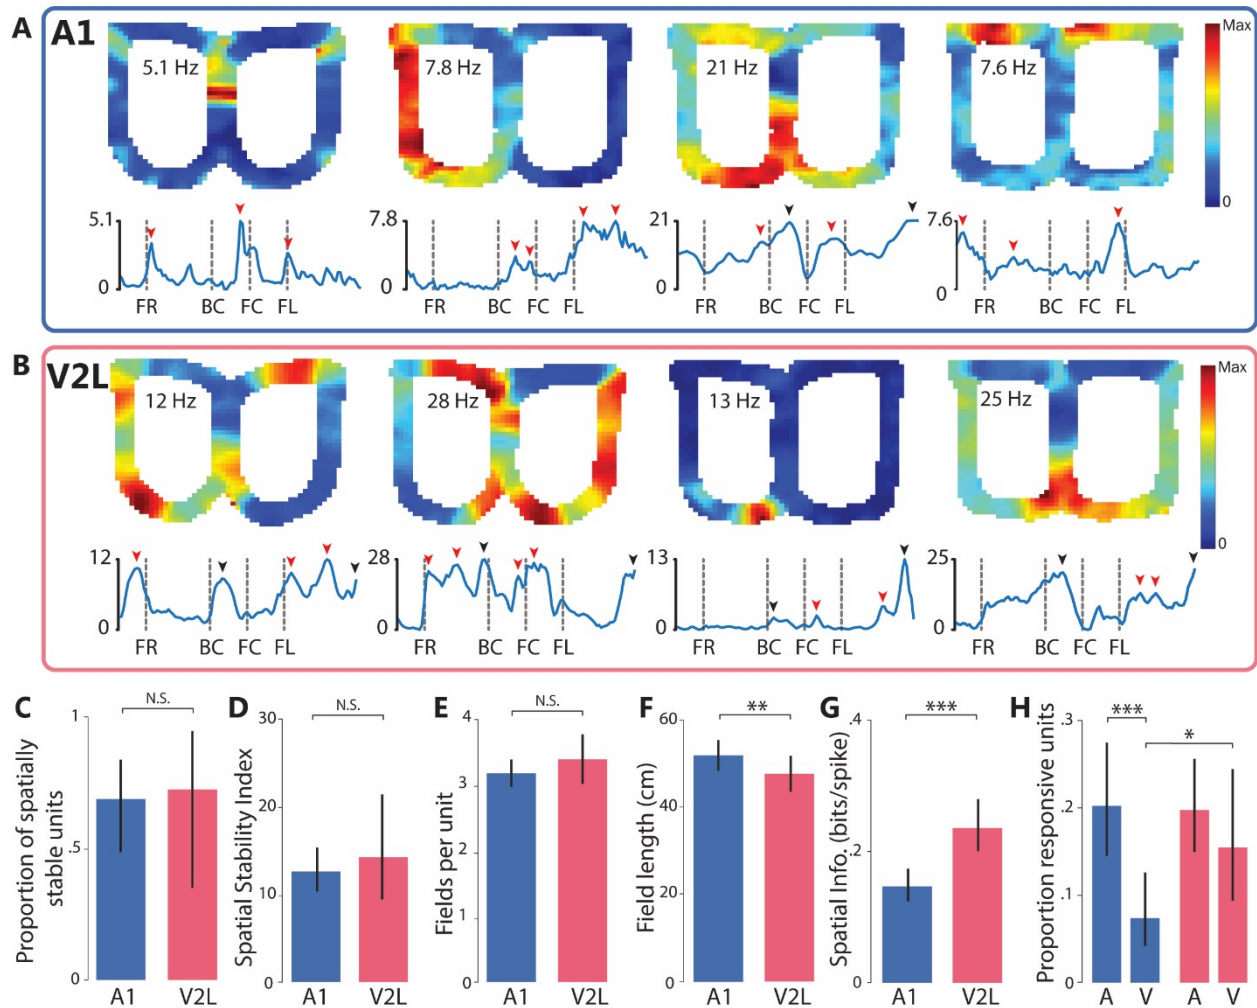

934

935

936

937

938

939

940

941

942

943

944

945

**Figure 2: Spatially localized firing patterns of A1 and V2L units. (A) Top panels.** Rate maps indicating the spatial firing-rate distribution of four example A1 units. The firing rate of the units is color-coded and the peak rates are indicated in the left wing of the map. **Bottom panels.** Firing rate distributions along the linearized version of the track corresponding to the rate maps shown in the top panels. Red arrow heads indicate individual firing field peaks. Black arrow heads indicate a single firing field peak that spans across an edge of the linearized track. Abbreviations below linear rate maps refer to landmark locations (fig. 1A). **(B)** as (A) but for four example V2L units. **(C)** Estimate of the proportion of spatially stable units in the A1 and V2L populations. Black vertical lines throughout (C-H) indicate 95% confidence intervals (N.S.:  $p > 0.05$ , F-test). **(D)** Spatial stability index of spatially stable units. **(E)** Number of firing fields per spatially stable unit **(F)** Field length per unit (\*\*,  $p < 0.01$ ). **(G)** Spatial information of spatially stable units (\*\*\*,  $p <$

946 0.001). **(H)** Proportions of stimulus responsive neurons in A1 (blue bars) and V2L (red) to auditory and  
 947 visual stimuli (\*,  $p < 0.05$ ).  
 948

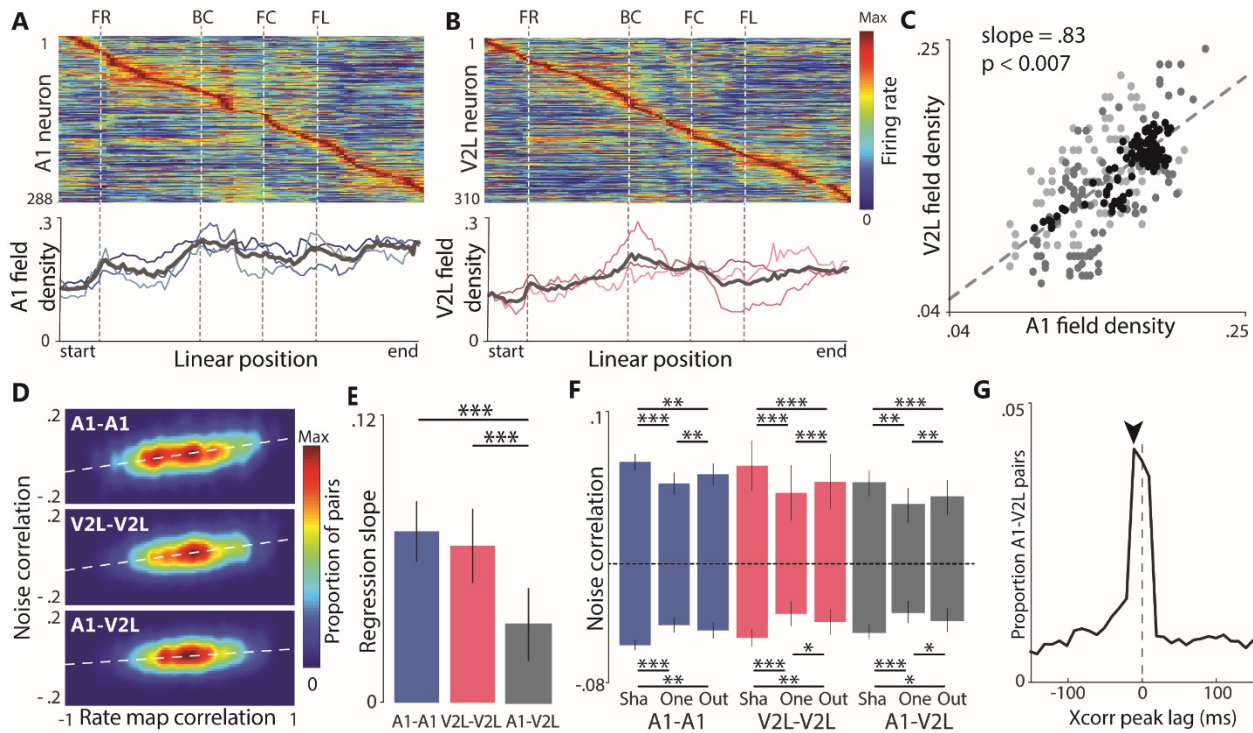

949  
 950  
 951 **Figure 3: Spatial and temporal firing relations between A1 and V2L neurons. (A) Top panel.** Joint linear  
 952 rate map including all individual, spatially stable units recorded from A1. Firing rate is color-coded and the  
 953 individual rate maps are sorted by peak location. *Bottom panel.* The firing field density across the spatial  
 954 bins on the track are shown for the individual rats (thin, colored lines) and the mean across rats (thick,  
 955 grey lines). The firing field density expresses for each spatial bin the proportion of individual firing fields  
 956 that include that bin. **(B)** as (A) but for V2L. **(C)** Correlation between firing field densities of A1 and V2L  
 957 across spatial bins. Dots correspond to individual spatial bins; different shades of grey correspond to  
 958 individual rats. The dashed line indicates the linear regression of mean field densities across rats according  
 959 to the linear mixed effects model. The value of  $p$  indicates the significance of the regression line. **(D)** Heat  
 960 maps show the proportions of cell pairs averaged across rats as a function of observed rate map  
 961 correlations and noise correlations for A1-A1 pairs (top), V2L-V2L pairs (middle) and A1-V2L pairs  
 962 (bottom). White, dashed lines indicate regression lines from a linear mixed effects model, indicating the  
 963 significant, positive relationship between rate map correlations and noise correlations. **(E)** Bars indicate

964 the slope of the regression of noise correlations on rate map correlations (white, dashed lines in **D**) for  
965 the different single-unit pair types, with error bars indicating 95% confidence bounds versus 0. Asterisks  
966 indicate a significant difference between groups (\*\*\*:  $p < 0.001$ ). **(F)** Mean pairwise noise correlations for  
967 the within and between-area pairs and field configuration presented for significantly positively correlated  
968 pairs and significantly negatively correlated pairs separately. *Sha*: locations shared between firing fields  
969 of both units; *One*: locations exclusively appearing in the firing field of one of the two units, but not the  
970 other; *Out*: locations outside of the firing fields of either unit. Error bars are 95% confidence bounds versus  
971 0. Asterisks indicate a significant difference between groups (\*\*\*:  $p < 0.001$ , \*\*:  $p < 0.01$ , \*:  $p < 0.05$ ). **(G)**  
972 Proportions of A1-V2L unit pairs with observed temporal cross-correlation peak lags, averaged across rats.  
973 Black arrow indicates the lag with the highest average proportion of pairs. Negative lags indicate that  
974 activity of the A1 unit precedes that of the V2L unit.  
975

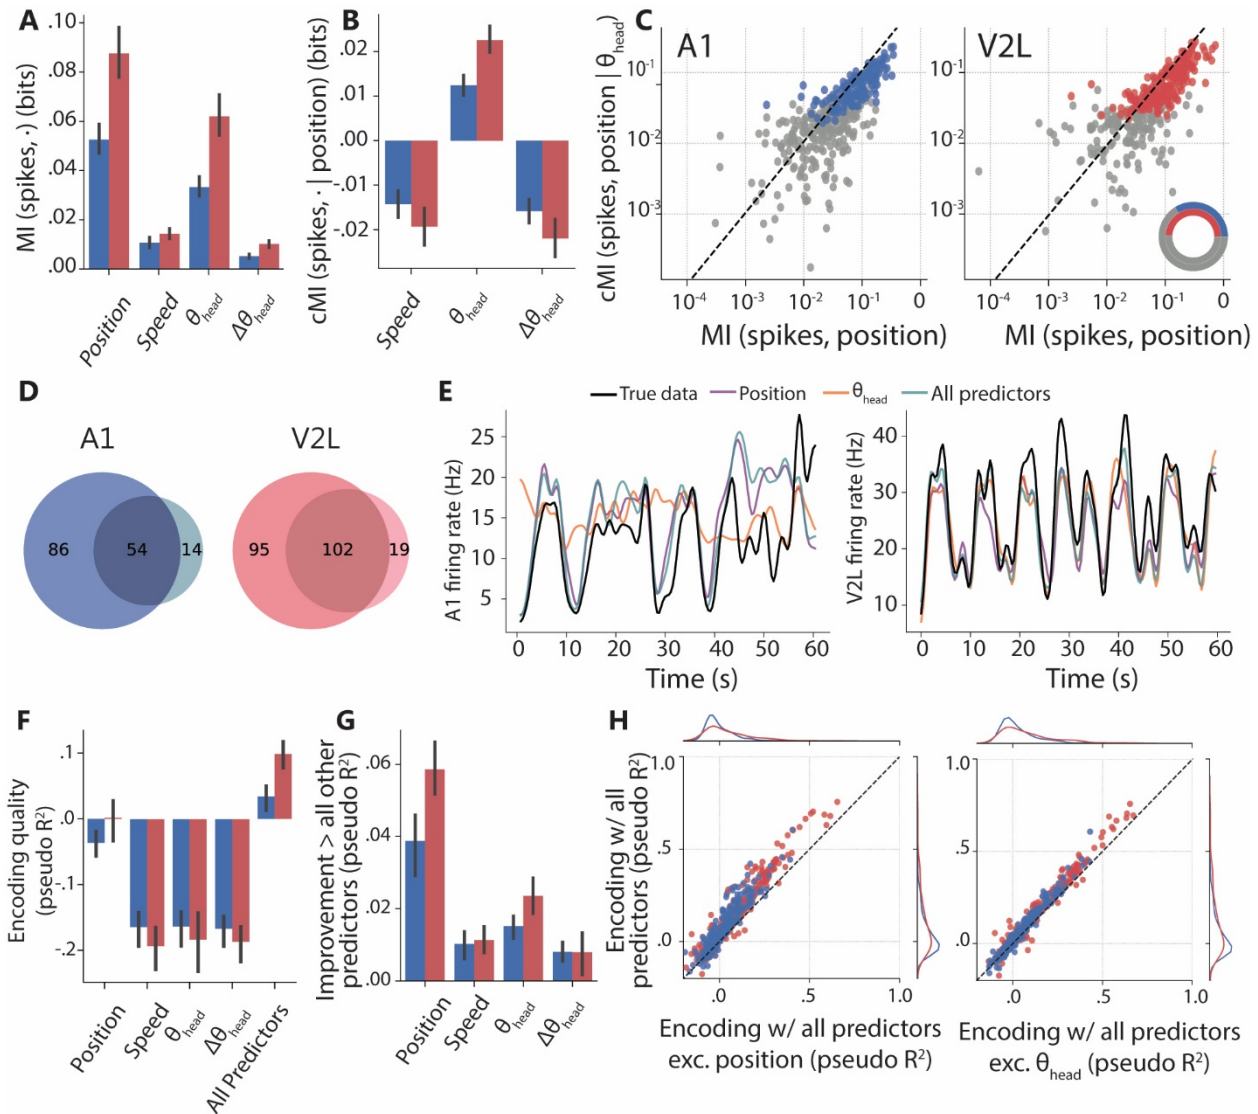

976

977 **Figure 4: Encoding: predicting single-unit spiking activity from behavioral factors. (A)** Average mutual  
 978 information (MI) between the spiking activity of A1 (blue) and V2L (red) single neurons and the behavioral  
 979 factors position, running speed, head direction ( $\theta_{\text{head}}$ ), and head direction change ( $\Delta\theta_{\text{head}}$ ). Error bars  
 980 represent 95% bootstrapped confidence bounds. **(B)** Debiased, conditional mutual information (cMI)  
 981 between spiking activity and behavioral factors speed, head direction and changes in head direction,  
 982 conditional on position. Error bars as in A. **(C)** Relationship between the MI of spikes and position and the  
 983 cMI between spikes and position conditional on head direction for all spatially stable single units for A1  
 984 (left) and V2L (right). Blue/red points mark units with significant cMI about position conditional on  $\theta_{\text{head}}$ ,  
 985 indicating that these units carry significant information on position that cannot be explained by  $\theta_{\text{head}}$ . Inset  
 986 shows in color the number of units per area showing significant cMI about position conditional on  $\theta_{\text{head}}$  as

987 fraction of the total number of units (grey). **(D)** Venn diagrams showing for each area the number of  
988 neurons transmitting significant  $cMI(\text{spikes, position} \mid \theta_{\text{head}})$  (dark color) and  $cMI(\text{spikes, } \theta_{\text{head}} \mid \text{position})$   
989 (light color). Overlapping region indicates neurons which transmit significant information on both position  
990 and  $\theta_{\text{head}}$ , neither of which can be explained entirely by the other factor. **(E)** A random forest encoder was  
991 used to predict spiking behavior on the basis of position, running speed,  $\theta_{\text{head}}$  and  $\Delta\theta_{\text{head}}$ . Figure shows 60  
992 s of firing rate of an example A1 unit (black line; left panel) and V2L unit (black line; right panel) and the  
993 predicted firing rate based on the models including the different behavioral parameters (colored lines).  
994 **(F)** Mean encoding quality across all A1 (blue) and V2L (red) units using single behavioral factors as  
995 predictor and using all predictors. Error bars as in A. **(G)** Mean improvement in encoding quality across all  
996 single units following the addition of the indicated behavioral factor to a model already containing all  
997 other factors. Error bars are 95% confidence bounds. **(H)** The relationship between encoding quality of  
998 individual single units when all predictors are considered and the encoding quality when all predictors  
999 except head direction (left) or linear position (right) are considered. Points above the diagonal belong to  
1000 units with improved encoding due to the inclusion of linear position/ head direction which cannot be  
1001 attributed to any other included factor. Blue: A1 units, red: V2L units. Diagrams to the right and top of the  
1002 main scatterplot show the empirical distributions of the data depicted in the scatterplots projected onto  
1003 a single dimension.  
1004

1005

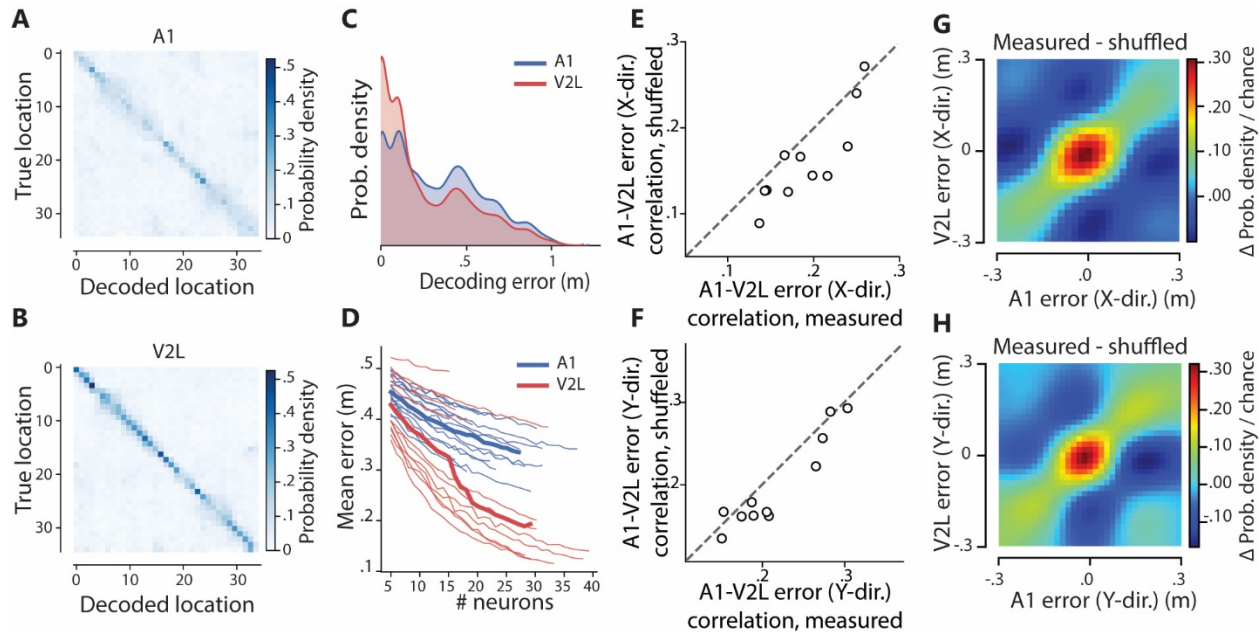

1006

1007

1008

1009 **Figure 5: Spatial position can be reconstructed from A1 and V2L populations using a Bayesian decoder.**

1010 **(A)** Confusion matrices indicating the performance of Bayesian decoding of linearized position from A1

1011 neuronal populations averaged across sessions. The probability that a sample of spiking activity is assigned

1012 by the decoder to the true location of the rat is coded in blue shades. **(B)** as (A) but for V2L populations.

1013 **(C)** Distribution of decoding errors (i.e. distances between the true and decoded position) across A1 (blue)

1014 and V2L (red) sessions. **(D)** Decoding error as a function of population size, obtained by randomly selecting

1015 units from the neuronal populations. Thin lines indicate means for individual sessions for A1 (blue) and

1016 V2L (red). Thick lines indicate means over sessions. **(E)** Correlations of measured (abscissa) and shuffled

1017 (ordinate) instantaneous decoding errors in the X-dimension of the maze. Shuffling was performed inside

1018 the same spatial bin and within the same running speed range. **(F)** Same as (E) but for the Y-dimension.

1019 **(G)** The size and direction of instantaneous errors were correlated between A1 and V2L. Color coded is

1020 the frequency of observing an instantaneous decoding error of a particular size and direction in the X-

1021 dimension after subtracting the frequency of instantaneous errors of a particular size and direction

1022 following shuffling of the errors within the same spatial bin and speed range. E.g. a value of +0.3 indicates

1023 that an error of that particular size and direction is 30% more likely to be observed in actual data than in

1024 shuffled data. **(H)** Same as (G) but for the Y-dimension.

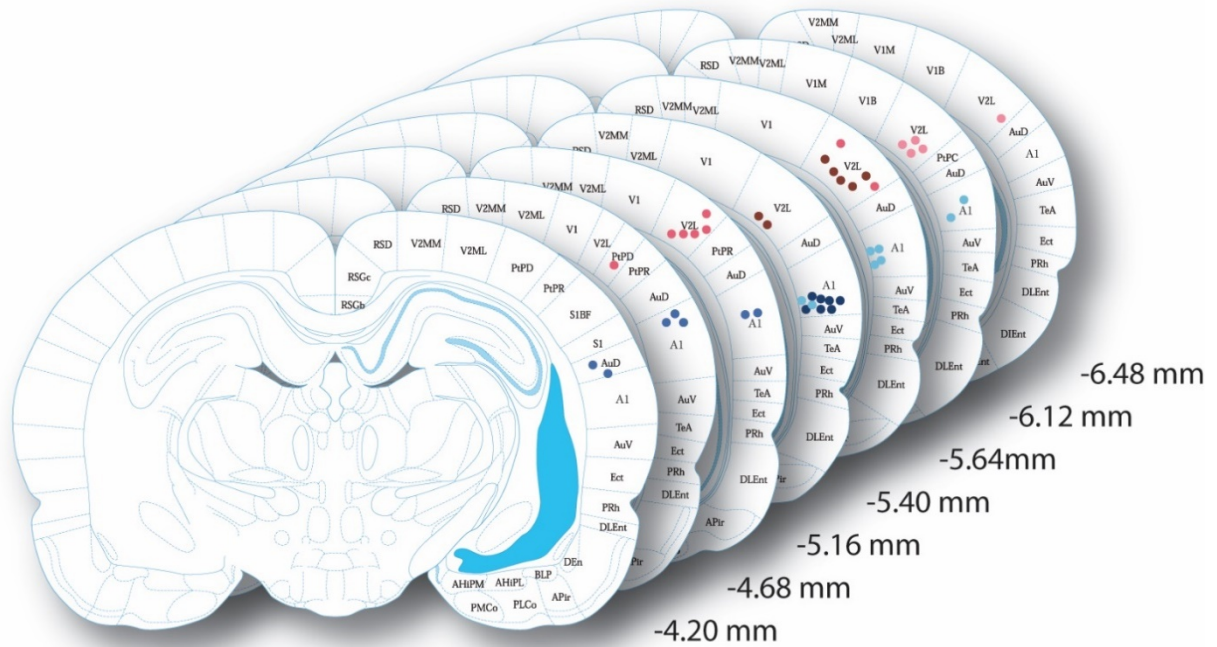

1025

1026

1027

1028 **Supplementary figure S1: Histology**

1029 Dots indicate locations of tetrode endpoints. Red dots represent endpoints of tetrodes targeted at V2L,

1030 blue dots endpoints of tetrodes targeted at A1. Three different shades were used to represent data from

1031 the three subjects. Light blue and light red correspond to the first subject, medium blue and medium red

1032 to the second subject and dark red and dark blue to the third subject. Numbers indicate distance from

1033 Bregma. Plates adapted from Paxinos & Watson (2007).

1034

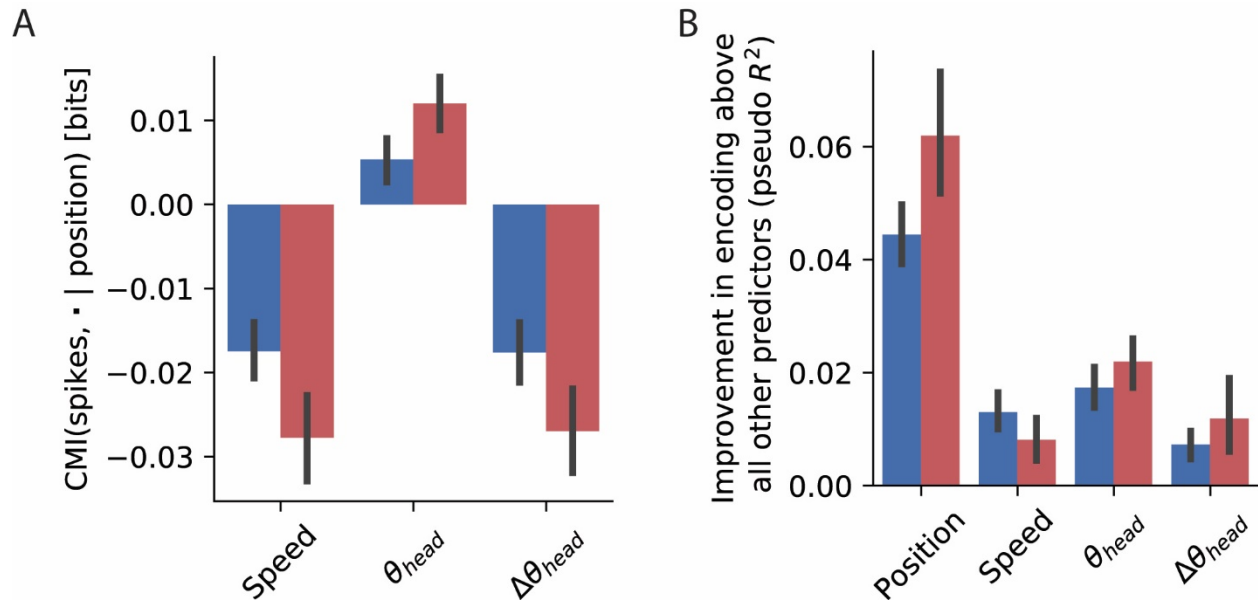

1035

1036

1037 **Supplementary figure S2: Encoding without stimulus presentation period**

1038 **(A)** Debiased, conditional mutual information (cMI) between spiking activity and behavioral factors speed,  
1039 head direction and changes in head direction, conditional on position (red bars: V2L; blue bars: A1). For  
1040 this analysis, data from the period around stimulus presentation  $\pm 1$  s were ignored. Error bars represent  
1041 95% bootstrapped confidence bounds. **(B)** Mean improvement in encoding quality of the random forest  
1042 encoder across all single units following the addition of the indicated behavioral factor to a model already  
1043 containing all other factors. For this analysis, data from the period around stimulus presentation  $\pm 1$  s  
1044 were ignored. Error bars are 95% confidence bounds.

1045

1046

1047



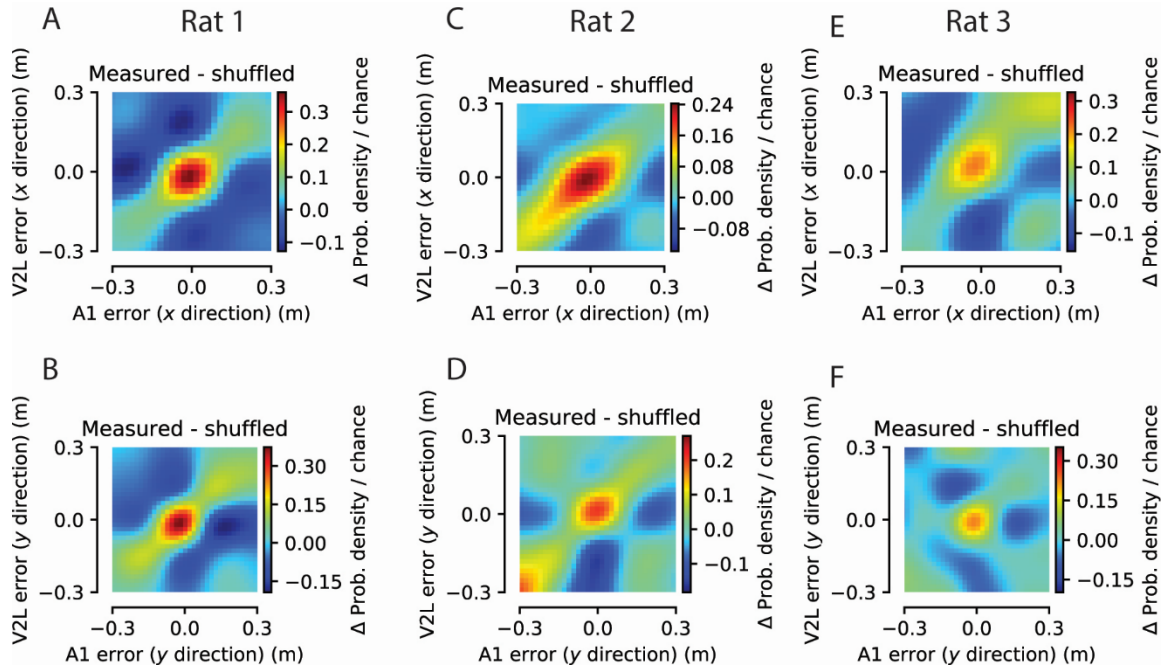

1048

1049

1050

1051

1052 **Supplementary figure S3: Correlations in instantaneous decoding error per subject**

1053 The size and direction of instantaneous decoding errors were correlated between A1 and V2L for

1054 individual subjects. **(A)** Color coded is the frequency of observing an instantaneous decoding error of a

1055 particular size and direction in the X-dimension (in A1, abscissa, vs. V2L, ordinate) relative to the frequency

1056 of instantaneous errors of a particular size and direction following shuffling of the errors within the same

1057 spatial bin and speed range. Data from the first subject. **(B)** as (A) but for the Y-dimension. **(C)** and **(D)**, as

1058 (A) and (B) but for the second subject. **(E)** and **(F)** as (A) and (B) but for the third subject.

1059

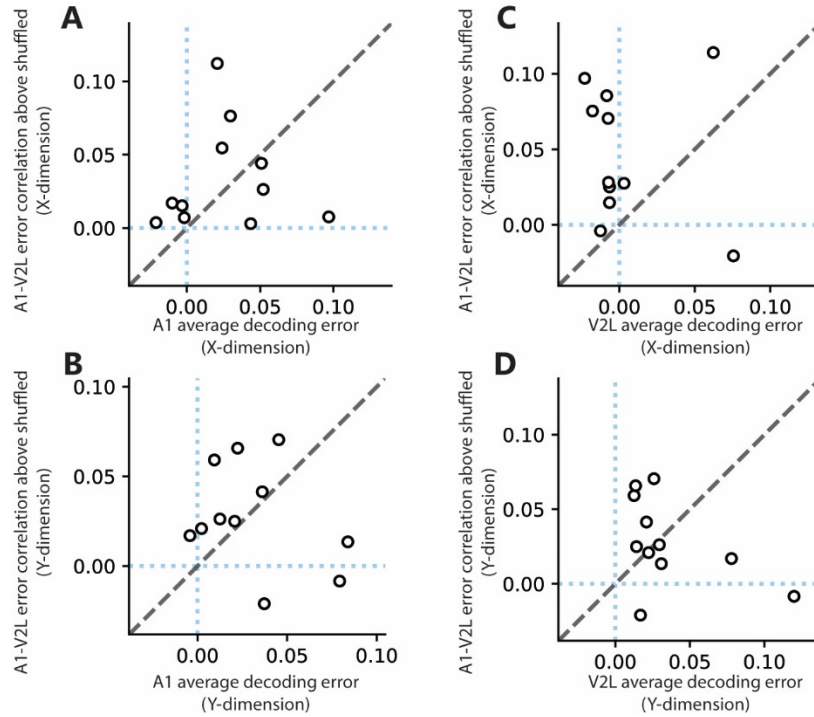

1060

1061 **Supplementary figure S4: Average decoding error and instantaneous error correlations between areas**  
1062 **are uncorrelated**

1063 **(A)** Using Pearson's correlation, we found no linear relationship between the average decoding error in  
1064 the X-dimension in A1 and the average correlation in instantaneous decoding error in the X-dimension  
1065 between A1 and V2L. Each dot represents a session included in the decoding analysis for both sessions.

1066 **(B)** As (A) but for the Y-dimension. **(C)** As (A) but for the average decoding error in V2L. **(D)** as (C) but for  
1067 the Y-dimension.

1068

## 1069 **References**

- 1070
- 1071 Averbeck, B.B., Latham, P.E., and Pouget, A. (2006). Neural correlations, population coding and  
1072 computation. *Nat Rev Neurosci* 7, 358-366.
- 1073 Ayaz, A., Saleem, Aman B., Schölvinck, Marieke L., and Carandini, M. (2013). Locomotion  
1074 Controls Spatial Integration in Mouse Visual Cortex. *Current Biology* 23, 890-894.
- 1075 Barresi, M., Grasso, C., Li Volsi, G., and Manzoni, D. (2013). Effects of body to head rotation on  
1076 the labyrinthine responses of rat vestibular neurons. *Neuroscience* 244, 134-146.
- 1077 Benjamin, A.S., Fernandes, H.L., Tomlinson, T., Ramkumar, P., VerSteg, C., Chowdhury, R.H.,  
1078 Miller, L.E., and Kording, K.P. (2018). Modern Machine Learning as a Benchmark for Fitting  
1079 Neural Responses. *Frontiers in Computational Neuroscience* 12.
- 1080 Bizley, J.K., Nodal, F.R., Bajo, V.M., Nelken, I., and King, A.J. (2007). Physiological and  
1081 Anatomical Evidence for Multisensory Interactions in Auditory Cortex. *Cerebral Cortex* 17, 2172-  
1082 2189.
- 1083 Bos, J.J., Vinck, M., Marchesi, P., Keestra, A., van Mourik-Donga, L.A., Jackson, J.C., Verschure,  
1084 P.F.M.J., and Pennartz, C.M.A. (2019). Multiplexing of Information about Self and Others in  
1085 Hippocampal Ensembles. *Cell Reports* 29, 3859-3871.e3856.
- 1086 Bos, J.J., Vinck, M., van Mourik-Donga, L.A., Jackson, J.C., Witter, M.P., and Pennartz, C.M.A.  
1087 (2017). Perirhinal firing patterns are sustained across large spatial segments of the task  
1088 environment. *Nature Communications* 8, 15602.
- 1089 Brosch, M., Selezneva, E., and Scheich, H. (2005). Nonauditory Events of a Behavioral Procedure  
1090 Activate Auditory Cortex of Highly Trained Monkeys. *Journal of Neuroscience* 25, 6797-6806.
- 1091 Budinger, E., and Scheich, H. (2009). Anatomical connections suitable for the direct processing  
1092 of neuronal information of different modalities via the rodent primary auditory cortex. *Hearing*  
1093 *Research* 258, 16-27.
- 1094 Campi, K.L., Bales, K.L., Grunewald, R., and Krubitzer, L. (2010). Connections of Auditory and  
1095 Visual Cortex in the Prairie Vole (*Microtus ochrogaster*): Evidence for Multisensory Processing in  
1096 Primary Sensory Areas. *Cerebral Cortex* 20, 89-108.
- 1097 Chen, X., DeAngelis, G.C., and Angelaki, D.E. (2018). Flexible egocentric and allocentric  
1098 representations of heading signals in parietal cortex. *Proceedings of the National Academy of*  
1099 *Sciences of the United States of America* 115, E3305-E3312.
- 1100 Clark, B.J., Simmons, C.M., Berkowitz, L.E., and Wilber, A.A. (2018). The retrosplenial-parietal  
1101 network and reference frame coordination for spatial navigation. *Behavioral Neuroscience* 132,  
1102 416-429.
- 1103 Clemens, L.E., Jansson, E.K.H., Portal, E., Riess, O., and Nguyen, H.P. (2014). A behavioral  
1104 comparison of the common laboratory rat strains Lister Hooded, Lewis, Fischer 344 and Wistar  
1105 in an automated homecage system. *Genes, Brain, and Behavior* 13, 305-321.
- 1106 Cullen, K.E. (2014). The neural encoding of self-generated and externally applied movement:  
1107 implications for the perception of self-motion and spatial memory. *Frontiers in Integrative*  
1108 *Neuroscience* 7, 108.
- 1109 D'Souza, R.D., Meier, A.M., Bista, P., Wang, Q., and Burkhalter, A. (2016). Recruitment of  
1110 inhibition and excitation across mouse visual cortex depends on the hierarchy of interconnecting  
1111 areas. *eLife* 5, e19332.
- 1112 Davidson, T.J., Kloosterman, F., and Wilson, M.A. (2009). Hippocampal replay of extended  
1113 experience. *Neuron* 63, 497-507.
- 1114 DiCarlo, J.J., and Cox, D.D. (2007). Untangling invariant object recognition. *Trends in Cognitive*  
1115 *Sciences* 11, 333-341.
- 1116 Ecker, A.S., Berens, P., Keliris, G.A., Bethge, M., Logothetis, N.K., and Tolias, A.S. (2010).  
1117 Decorrelated neuronal firing in cortical microcircuits. *Science* 327, 584-587.

- 1118 Eichenbaum, H. (2000). A cortical-hippocampal system for declarative memory. *Nat Rev Neurosci*  
1119 *1*, 41-50.
- 1120 Felleman, D.J., and Van Essen, D.C. (1991). Distributed hierarchical processing in the primate  
1121 cerebral cortex. *Cerebral Cortex* (New York, NY: 1991) *1*, 1-47.
- 1122 Fetsch, C.R., DeAngelis, G.C., and Angelaki, D.E. (2013). Bridging the gap between theories of  
1123 sensory cue integration and the physiology of multisensory neurons. *Nat Rev Neurosci* *14*, 429-  
1124 442.
- 1125 Fiser, A., Mahringer, D., Oyibo, H.K., Petersen, A.V., Leinweber, M., and Keller, G.B. (2016).  
1126 Experience-dependent spatial expectations in mouse visual cortex. *Nature Neuroscience* *19*,  
1127 1658-1664.
- 1128 Fournier, J., Saleem, A.B., Diamanti, E.M., Wells, M.J., Harris, K.D., and Carandini, M. (2019).  
1129 Modulation of visual cortex by hippocampal signals. *bioRxiv*, 586917.
- 1130 Fournier, J., Saleem, A.B., Diamanti, E.M., Wells, M.J., Harris, K.D., and Carandini, M. (2020).  
1131 Mouse Visual Cortex Is Modulated by Distance Traveled and by Theta Oscillations. *Current*  
1132 *Biology* *30*, 3811-3817.e3816.
- 1133 Franke, F., Fiscella, M., Sevelev, M., Roska, B., Hierlemann, A., and Azeredo da Silveira, R.  
1134 (2016). Structures of Neural Correlation and How They Favor Coding. *Neuron* *89*, 409-422.
- 1135 Friston, K. (2005). A theory of cortical responses. *Philosophical Transactions of the Royal Society*  
1136 *of London Series B, Biological Sciences* *360*, 815-836.
- 1137 Furtak, S.C., Wei, S.M., Agster, K.L., and Burwell, R.D. (2007). Functional neuroanatomy of the  
1138 parahippocampal region in the rat: the perirhinal and postrhinal cortices. *Hippocampus* *17*, 709-  
1139 722.
- 1140 Gămănuț, R., Kennedy, H., Toroczka, Z., Ercsey-Ravasz, M., Van Essen, D.C., Knoblauch, K.,  
1141 and Burkhalter, A. (2018). The Mouse Cortical Connectome, Characterized by an Ultra-Dense  
1142 Cortical Graph, Maintains Specificity by Distinct Connectivity Profiles. *Neuron* *97*, 698-715.e610.
- 1143 Gavornik, J.P., and Bear, M.F. (2014). Learned spatiotemporal sequence recognition and  
1144 prediction in primary visual cortex. *Nature Neuroscience* *17*, 732-737.
- 1145 Goltstein, P.M., Coffey, E.B.J., Roelfsema, P.R., and Pennartz, C.M.A. (2013). In Vivo Two-  
1146 Photon Ca<sup>2+</sup> Imaging Reveals Selective Reward Effects on Stimulus-Specific Assemblies in  
1147 Mouse Visual Cortex. *Journal of Neuroscience* *33*, 11540-11555.
- 1148 Goltstein, P.M., Montijn, J.S., and Pennartz, C.M.A. (2015). Effects of Isoflurane Anesthesia on  
1149 Ensemble Patterns of Ca<sup>2+</sup> Activity in Mouse V1: Reduced Direction Selectivity Independent of  
1150 Increased Correlations in Cellular Activity. *PLOS ONE* *10*, e0118277.
- 1151 Gray, C.M., Maldonado, P.E., Wilson, M., and McNaughton, B. (1995). Tetrodes markedly  
1152 improve the reliability and yield of multiple single-unit isolation from multi-unit recordings in cat  
1153 striate cortex. *Journal of neuroscience methods* *63*, 43-54.
- 1154 Groenewegen, H.J., and Uylings, H.B. (2000). The prefrontal cortex and the integration of  
1155 sensory, limbic and autonomic information. *Prog Brain Res* *126*, 3-28.
- 1156 Guitchounts, G., Masís, J., Wolff, S.B.E., and Cox, D. (2020). Encoding of 3D Head Orienting  
1157 Movements in the Primary Visual Cortex. *Neuron* *108*, 512-525.e514.
- 1158 Haggerty, D.C., and Ji, D. (2015). Activities of visual cortical and hippocampal neurons co-  
1159 fluctuate in freely moving rats during spatial behavior. *eLife* *4*, e08902.
- 1160 Hansen, B.J., Chelaru, M.I., and Dragoi, V. (2012). Correlated Variability in Laminar Cortical  
1161 Circuits. *Neuron* *76*, 590-602.
- 1162 Harris, J.A., Mihalas, S., Hirokawa, K.E., Whitesell, J.D., Choi, H., Bernard, A., Bohn, P., Caldejon,  
1163 S., Casal, L., Cho, A., *et al.* (2019). Hierarchical organization of cortical and thalamic connectivity.  
1164 *Nature* *575*, 195-202.
- 1165 Hawkins, J., Ahmad, S., and Cui, Y. (2017). A Theory of How Columns in the Neocortex Enable  
1166 Learning the Structure of the World. *Frontiers in neural circuits* *11*, 81.
- 1167 Heffner, H. (1978). Effect of auditory cortex ablation on localization and discrimination of brief  
1168 sounds. *Journal of Neurophysiology* *41*, 963-976.

- 1169 Hubel, D.H., and Wiesel, T.N. (1962). Receptive fields, binocular interaction and functional  
1170 architecture in the cat's visual cortex. *The Journal of physiology* *160*, 106-154.
- 1171 Ibrahim, L.A., Mesik, L., Ji, X.-y., Fang, Q., Li, H.-f., Li, Y.-t., Zingg, B., Zhang, L.I., and Tao, H.W.  
1172 (2016). Cross-Modality Sharpening of Visual Cortical Processing through Layer-1-Mediated  
1173 Inhibition and Disinhibition. *Neuron* *89*, 1031-1045.
- 1174 Iurilli, G., Ghezzi, D., Olcese, U., Lassi, G., Nazzaro, C., Tonini, R., Tucci, V., Benfenati, F., and  
1175 Medini, P. (2012). Sound-driven synaptic inhibition in primary visual cortex. *Neuron* *73*, 814-828.
- 1176 Jaramillo, S., and Zador, A.M. (2011). The auditory cortex mediates the perceptual effects of  
1177 acoustic temporal expectation. *Nature Neuroscience* *14*, 246-251.
- 1178 Jenkins, W.M., and Merzenich, M.M. (1984). Role of cat primary auditory cortex for sound-  
1179 localization behavior. *Journal of Neurophysiology* *52*, 819-847.
- 1180 Ji, D., and Wilson, M.A. (2007). Coordinated memory replay in the visual cortex and hippocampus  
1181 during sleep. *Nat Neurosci* *10*, 100-107.
- 1182 Kadir, S.N., Goodman, D.F.M., and Harris, K.D. (2014). High-Dimensional Cluster Analysis with  
1183 the Masked EM Algorithm. *Neural Computation* *26*, 2379-2394.
- 1184 Kavanagh, G.L., and Kelly, J.B. (1987). Contribution of auditory cortex to sound localization by  
1185 the ferret (*Mustela putorius*). *Journal of Neurophysiology* *57*, 1746-1766.
- 1186 Keller, G.B., and Mscic-Flogel, T.D. (2018). Predictive Processing: A Canonical Cortical  
1187 Computation. *Neuron* *100*, 424-435.
- 1188 Knierim, J.J. (2002). Dynamic interactions between local surface cues, distal landmarks, and  
1189 intrinsic circuitry in hippocampal place cells. *Journal of Neuroscience* *22*, 6254-6264.
- 1190 Knöpfel, T., Sweeney, Y., Radulescu, C.I., Zabouri, N., Doostdar, N., Clopath, C., and Barnes,  
1191 S.J. (2019). Audio-visual experience strengthens multisensory assemblies in adult mouse visual  
1192 cortex. *Nature communications* *10*, 5684.
- 1193 Krumin, M., Lee, J.J., Harris, K.D., and Carandini, M. (2018). Decision and navigation in mouse  
1194 parietal cortex. *eLife* *7*, e42583.
- 1195 Lansink, C.S., Bakker, M., Buster, W., Lankelma, J., van der Blom, R., Westdorp, R., Joosten,  
1196 R.N.J.M.A., McNaughton, B.L., and Pennartz, C.M.A. (2007). A split microdrive for simultaneous  
1197 multi-electrode recordings from two brain areas in awake small animals. *Journal of neuroscience*  
1198 *methods* *162*, 129-138.
- 1199 Lansink, C.S., Jackson, J.C., Lankelma, J.V., Ito, R., Robbins, T.W., Everitt, B.J., and Pennartz,  
1200 C.M. (2012). Reward cues in space: commonalities and differences in neural coding by  
1201 hippocampal and ventral striatal ensembles. *J Neurosci* *32*, 12444-12459.
- 1202 Laramée, M.E., Kurotani, T., Rockland, K.S., Bronchti, G., and Boire, D. (2011). Indirect pathway  
1203 between the primary auditory and visual cortices through layer V pyramidal neurons in V2L in  
1204 mouse and the effects of bilateral enucleation. *European Journal of Neuroscience* *34*, 65-78.
- 1205 Leinweber, M., Ward, D.R., Sobczak, J.M., Attinger, A., and Keller, G.B. (2017). A Sensorimotor  
1206 Circuit in Mouse Cortex for Visual Flow Predictions. *Neuron* *95*, 1420-1432.e1425.
- 1207 Leutgeb, S., Leutgeb, J.K., Barnes, C.A., Moser, E.I., McNaughton, B.L., and Moser, M.B. (2005).  
1208 Independent codes for spatial and episodic memory in hippocampal neuronal ensembles. *Science*  
1209 *309*, 619-623.
- 1210 Lin, I.-C., Okun, M., Carandini, M., and Harris, K.D. (2015). The Nature of Shared Cortical  
1211 Variability. *Neuron* *87*, 644-656.
- 1212 Lizier, J.T. (2014). JIDT: An Information-Theoretic Toolkit for Studying the Dynamics of Complex  
1213 Systems. *Frontiers in Robotics and AI* *1*.
- 1214 Lopes, G., Bonacchi, N., Frazão, J., Neto, J.P., Atallah, B.V., Soares, S., Moreira, L., Matias, S.,  
1215 Itskov, P.M., Correia, P.A., *et al.* (2015). Bonsai: an event-based framework for processing and  
1216 controlling data streams. *Frontiers in Neuroinformatics* *9*.
- 1217 Louie, K., and Wilson, M.A. (2001). Temporally structured replay of awake hippocampal ensemble  
1218 activity during rapid eye movement sleep. *Neuron* *29*, 145-156.
- 1219 McGaugh, J.L. (2000). Memory--a century of consolidation. *Science* *287*, 248-251.

- 1220 McNaughton, B.L., Mizumori, S.J., Barnes, C.A., Leonard, B.J., Marquis, M., and Green, E.J.  
1221 (1994). Cortical representation of motion during unrestrained spatial navigation in the rat. *Cerebral*  
1222 *Cortex* (New York, NY: 1991) 4, 27-39.
- 1223 Medrea, I., and Cullen, K.E. (2013). Multisensory integration in early vestibular processing in  
1224 mice: the encoding of passive vs. active motion. *Journal of Neurophysiology* 110, 2704-2717.
- 1225 Meijer, G.T., Marchesi, P., Mejias, J.F., Montijn, J.S., Lansink, C.S., and Pennartz, C.M. (2020).  
1226 Neural Correlates of Multisensory Detection Behavior: Comparison of Primary and Higher-Order  
1227 Visual Cortex. *Cell Reports* 31, 107636.
- 1228 Meijer, G.T., Mertens, P.E.C., Pennartz, C.M.A., Olcese, U., and Lansink, C.S. (2019). The circuit  
1229 architecture of cortical multisensory processing: Distinct functions jointly operating within a  
1230 common anatomical network. *Prog Neurobiol* 174, 1-15.
- 1231 Meijer, G.T., Montijn, J.S., Pennartz, C.M.A., and Lansink, C.S. (2017). Audiovisual Modulation  
1232 in Mouse Primary Visual Cortex Depends on Cross-Modal Stimulus Configuration and  
1233 Congruency. *The Journal of Neuroscience: The Official Journal of the Society for Neuroscience*  
1234 37, 8783-8796.
- 1235 Middlebrooks, J.C., and Pettigrew, J.D. (1981). Functional classes of neurons in primary auditory  
1236 cortex of the cat distinguished by sensitivity to sound location. *The Journal of Neuroscience: The*  
1237 *Official Journal of the Society for Neuroscience* 1, 107-120.
- 1238 Miller, K.D. (2016). Canonical computations of cerebral cortex. *Current Opinion in Neurobiology*  
1239 37, 75-84.
- 1240 Miller, M.W., and Vogt, B.A. (1984). Direct connections of rat visual cortex with sensory, motor,  
1241 and association cortices. *Journal of Comparative Neurology* 226, 184-202.
- 1242 Montijn, J.S., Meijer, G.T., Lansink, C.S., and Pennartz, C.M. (2016). Population-Level Neural  
1243 Codes Are Robust to Single-Neuron Variability from a Multidimensional Coding Perspective. *Cell*  
1244 *Rep* 16, 2486-2498.
- 1245 Morrill, R.J., and Hasenstaub, A.R. (2018). Visual Information Present in Infragranular Layers of  
1246 Mouse Auditory Cortex. *J Neurosci* 38, 2854-2862.
- 1247 Namboodiri, Vijay Mohan K., Huertas, Marco A., Monk, Kevin J., Shouval, Harel Z., and  
1248 Hussain Shuler, Marshall G. (2015). Visually Cued Action Timing in the Primary Visual Cortex.  
1249 *Neuron* 86, 319-330.
- 1250 Newby, F.D., DiGirolamo, M., Cotsonis, G.A., and Kutner, M.H. (1990). Model of spontaneous  
1251 obesity in aging male Wistar rats. *The American Journal of Physiology* 259, R1117-1125.
- 1252 Niell, C.M., and Stryker, M.P. (2010). Modulation of Visual Responses by Behavioral State in  
1253 Mouse Visual Cortex. *Neuron* 65, 472-479.
- 1254 Nitz, D.A. (2006). Tracking Route Progression in the Posterior Parietal Cortex. *Neuron* 49, 747-  
1255 756.
- 1256 Niwa, M., Johnson, J.S., O'Connor, K.N., and Sutter, M.L. (2012). Activity Related to Perceptual  
1257 Judgment and Action in Primary Auditory Cortex. *Journal of Neuroscience* 32, 3193-3210.
- 1258 O'Keefe, J., and Nadel, L. (1978). *The hippocampus as a cognitive map* (Oxford: Clarendon  
1259 Press).
- 1260 Olcese, U., Bos, J.J., Vinck, M., Lankelma, J.V., Mourik-Donga, L.B.v., Schlumm, F., and  
1261 Pennartz, C.M.A. (2016). Spike-Based Functional Connectivity in Cerebral Cortex and  
1262 Hippocampus: Loss of Global Connectivity Is Coupled to Preservation of Local Connectivity  
1263 During Non-REM Sleep. *Journal of Neuroscience* 36, 7676-7692.
- 1264 Page, H.J.I., and Jeffery, K.J. (2018). Landmark-Based Updating of the Head Direction System  
1265 by Retrosplenial Cortex: A Computational Model. *Frontiers in Cellular Neuroscience* 12, 191.
- 1266 Pakan, J.M.P., Currie, S.P., Fischer, L., and Rochefort, N.L. (2018). The Impact of Visual Cues,  
1267 Reward, and Motor Feedback on the Representation of Behaviorally Relevant Spatial Locations  
1268 in Primary Visual Cortex. *Cell Reports* 24, 2521-2528.
- 1269 Paxinos, G., and Watson, C. (2007). *The Rat Brain in Stereotaxic Coordinates*, 6th edn (Academic  
1270 Press).

- 1271 Pennartz, C.M.A. (2018). Consciousness, Representation, Action: The Importance of Being Goal-  
1272 Directed. *Trends Cogn Sci* 22, 137-153.
- 1273 Pennartz, C.M.A., Dora, S., Muckli, L., and Lorteije, J.A.M. (2019). Towards a Unified View on  
1274 Pathways and Functions of Neural Recurrent Processing. *Trends in Neurosciences* 42, 589-603.
- 1275 Picton, T.W., Hillyard, S.A., Krausz, H.I., and Galambos, R. (1974). Human auditory evoked  
1276 potentials. I. Evaluation of components. *Electroencephalogr Clin Neurophysiol* 36, 179-190.
- 1277 Rao, R.P.N., and Ballard, D.H. (1999). Predictive coding in the visual cortex: a functional  
1278 interpretation of some extra-classical receptive-field effects. *Nature Neuroscience* 2, 79.
- 1279 Rosenbaum, R., Smith, M.A., Kohn, A., Rubin, J.E., and Doiron, B. (2017). The spatial structure  
1280 of correlated neuronal variability. *Nature Neuroscience* 20, 107-114.
- 1281 Rusu, S.I., and Pennartz, C.M.A. (2020). Learning, memory and consolidation mechanisms for  
1282 behavioral control in hierarchically organized cortico-basal ganglia systems. *Hippocampus* 30,  
1283 73-98.
- 1284 Saleem, A.B., Diamanti, E.M., Fournier, J., Harris, K.D., and Carandini, M. (2018). Coherent  
1285 encoding of subjective spatial position in visual cortex and hippocampus. *Nature* 562, 124.
- 1286 Sargolini, F., Fyhn, M., Hafting, T., McNaughton, B.L., Witter, M.P., Moser, M.-B., and Moser, E.I.  
1287 (2006). Conjunctive representation of position, direction, and velocity in entorhinal cortex. *Science*  
1288 (New York, NY) 312, 758-762.
- 1289 Scheich, H., Brechmann, A., Brosch, M., Budinger, E., and Ohl, F.W. (2007). The cognitive  
1290 auditory cortex: Task-specificity of stimulus representations. *Hearing Research* 229, 213-224.
- 1291 Schmitzer-Torbert, N., Jackson, J., Henze, D., Harris, K., and Redish, A.D. (2005). Quantitative  
1292 measures of cluster quality for use in extracellular recordings. *Neuroscience* 131, 1-11.
- 1293 Schulz, D.P.A., Sahani, M., and Carandini, M. (2015). Five key factors determining pairwise  
1294 correlations in visual cortex. *Journal of Neurophysiology*.
- 1295 Schürmann, T., Vogt, J., Christ, O., and Beckerle, P. (2019). The Bayesian causal inference  
1296 model benefits from an informed prior to predict proprioceptive drift in the rubber foot illusion.  
1297 *Cogn Process* 20, 447-457.
- 1298 Shuler, M.G., and Bear, M.F. (2006). Reward Timing in the Primary Visual Cortex. *Science* 311,  
1299 1606-1609.
- 1300 Skaggs, W.E., McNaughton, B.L., Gothard, K.M., and Markus, E.J. (1992). An Information-  
1301 theoretic Approach to Deciphering the Hippocampal Code (Morgan Kaufmann Publishers Inc.).
- 1302 Smith, M.A., and Kohn, A. (2008). Spatial and Temporal Scales of Neuronal Correlation in Primary  
1303 Visual Cortex. *Journal of Neuroscience* 28, 12591-12603.
- 1304 Speakman, A., and O'Keefe, J. (1990). Hippocampal Complex Spike Cells do not Change Their  
1305 Place Fields if the Goal is Moved Within a Cue Controlled Environment. *The European journal of*  
1306 *neuroscience* 2, 544-555.
- 1307 Squire, L.R. (1986). Mechanisms of memory. *Science (New York, NY)* 232, 1612-1619.
- 1308 Stein, B.E., Stanford, T.R., and Rowland, B.A. (2014). Development of multisensory integration  
1309 from the perspective of the individual neuron. *Nat Rev Neurosci* 15, 520-535.
- 1310 Taube, J.S. (1995). Head direction cells recorded in the anterior thalamic nuclei of freely moving  
1311 rats. *The Journal of Neuroscience: The Official Journal of the Society for Neuroscience* 15, 70-  
1312 86.
- 1313 Taube, J.S. (2007). The head direction signal: origins and sensory-motor integration. *Annual*  
1314 *Review of Neuroscience* 30, 181-207.
- 1315 Taube, J.S., Muller, R.U., and Ranck, J.B. (1990). Head-direction cells recorded from the  
1316 postsubiculum in freely moving rats. II. Effects of environmental manipulations. *Journal of*  
1317 *Neuroscience* 10, 436-447.
- 1318 Teyler, T.J., and DiScenna, P. (1985). The role of hippocampus in memory: a hypothesis.  
1319 *Neurosci Biobehav Rev* 9, 377-389.
- 1320 Thompson, G.C., and Cortez, A.M. (1983). The inability of squirrel monkeys to localize sound  
1321 after unilateral ablation of auditory cortex. *Behavioural Brain Research* 8, 211-216.

- 1322 Town, S.M., Brimijoin, W.O., and Bizley, J.K. (2017). Egocentric and allocentric representations  
1323 in auditory cortex. *PLOS Biology* 15, e2001878.
- 1324 Vélez-Fort, M., Bracey, E.F., Keshavarzi, S., Rousseau, C.V., Cossell, L., Lenzi, S.C., Strom, M.,  
1325 and Margrie, T.W. (2018). A Circuit for Integration of Head- and Visual-Motion Signals in Layer 6  
1326 of Mouse Primary Visual Cortex. *Neuron* 98, 179-191.e176.
- 1327 Wang, X., Liu, J., and Zhang, J. (2019). Chronic Unilateral Hearing Loss Disrupts Neural Tuning  
1328 to Sound-Source Azimuth in the Rat Primary Auditory Cortex. *Frontiers in Neuroscience* 13.
- 1329 Whitlock, Jonathan R., Pfuhl, G., Dagslott, N., Moser, M.-B., and Moser, Edvard I. (2012).  
1330 Functional Split between Parietal and Entorhinal Cortices in the Rat. *Neuron* 73, 789-802.
- 1331 Wilber, A.A., Clark, B.J., Forster, T.C., Tatsuno, M., and McNaughton, B.L. (2014). Interaction of  
1332 egocentric and world-centered reference frames in the rat posterior parietal cortex. *The Journal*  
1333 *of Neuroscience: The Official Journal of the Society for Neuroscience* 34, 5431-5446.
- 1334 Witter, M.P., Naber, P.A., van Haeften, T., Machielsen, W.C., Rombouts, S.A., Barkhof, F.,  
1335 Scheltens, P., and Lopes da Silva, F.H. (2000). Cortico-hippocampal communication by way of  
1336 parallel parahippocampal-subicular pathways. *Hippocampus* 10, 398-410.
- 1337 Zaidel, A., DeAngelis, G.C., and Angelaki, D.E. (2017). Decoupled choice-driven and stimulus-  
1338 related activity in parietal neurons may be misrepresented by choice probabilities. *Nature*  
1339 *Communications* 8, 715.
- 1340 Zohary, E., Shadlen, M.N., and Newsome, W.T. (1994). Correlated neuronal discharge rate and  
1341 its implications for psychophysical performance. *Nature* 370, 140-143.
- 1342
